# Supplementary material for: Peptidoglycan-tethered and free forms of the Braun lipoprotein are in dynamic equilibrium in Escherichia coli
Source: eLife journal article supplement (doi:10.7554/elife.91598), 2023-12-04

**BW25113**

**t = 0 min**

**Tri** → **KR**  
 $m/z = 607.347$   
 $z = 2$

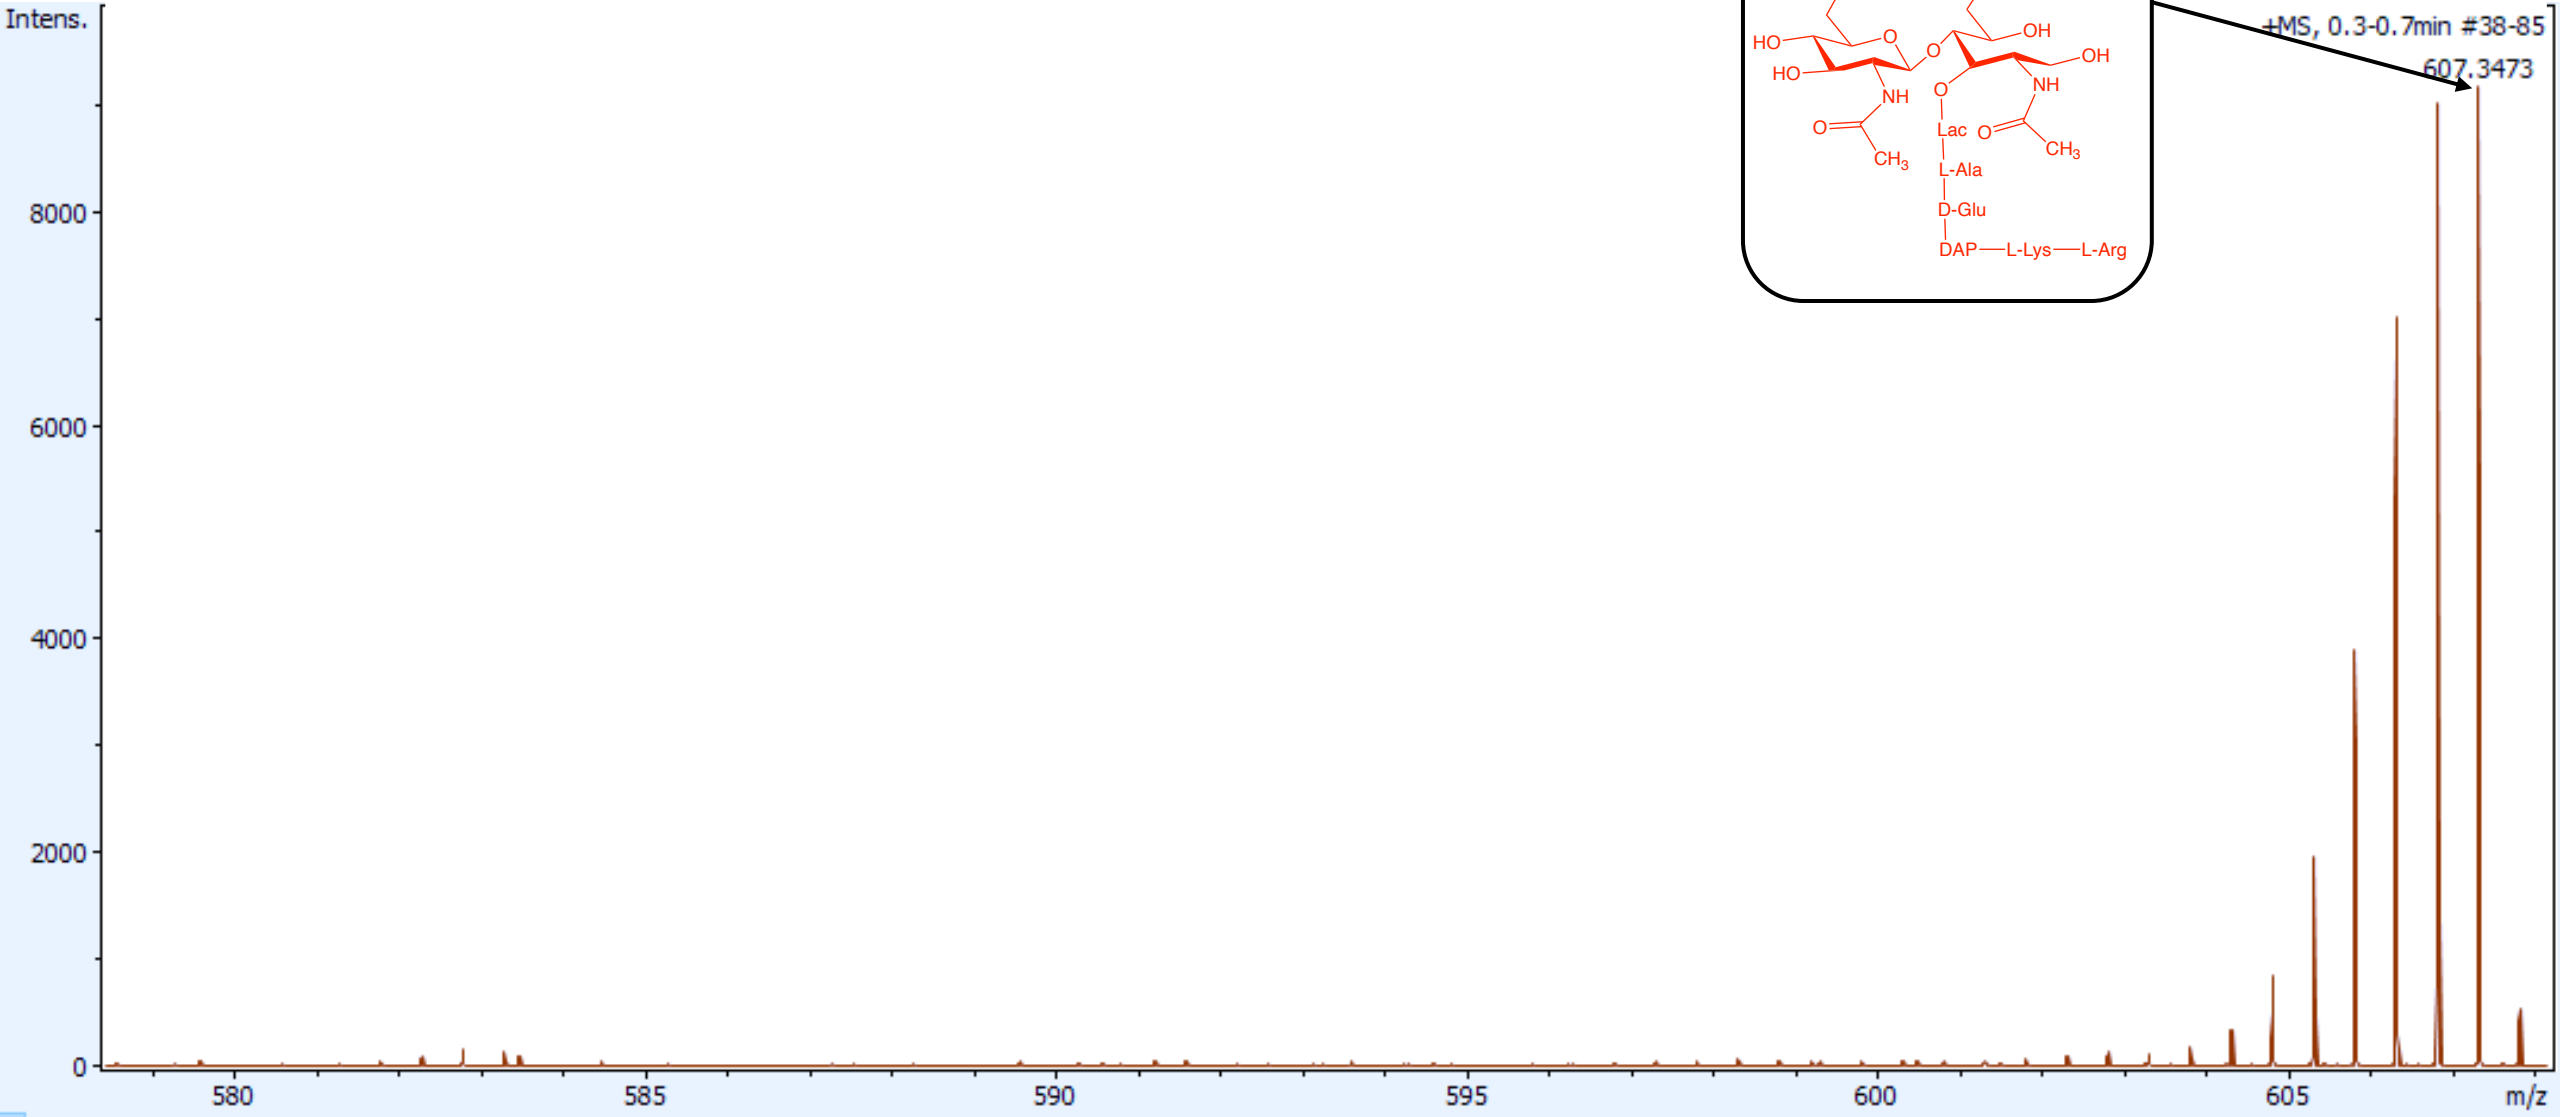

BW25113

t = 5 min

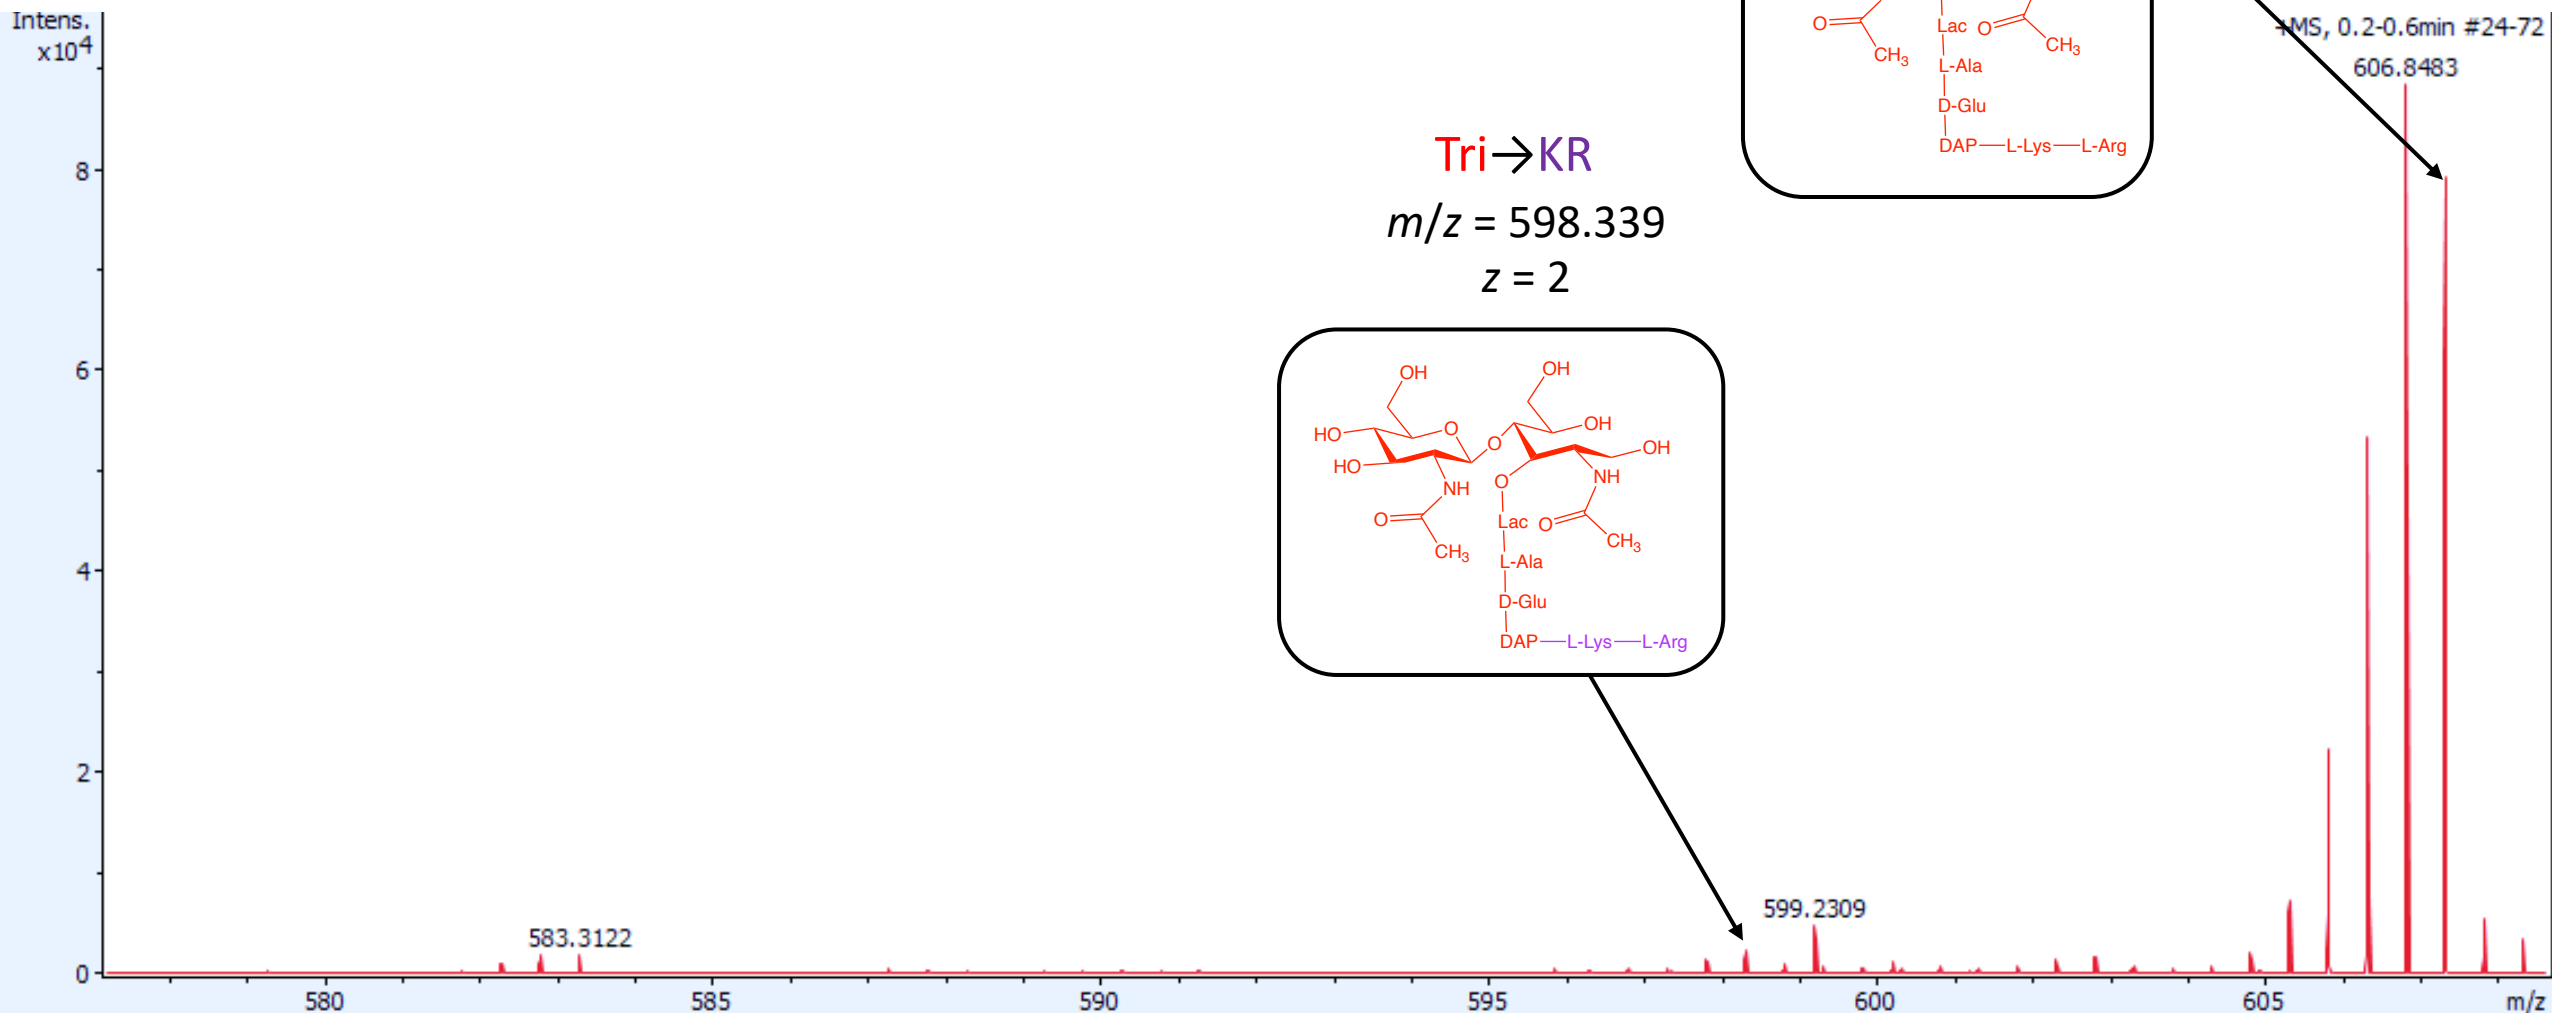

BW25113

t = 10 min

Tri→KR  
m/z = 607.347  
z = 2

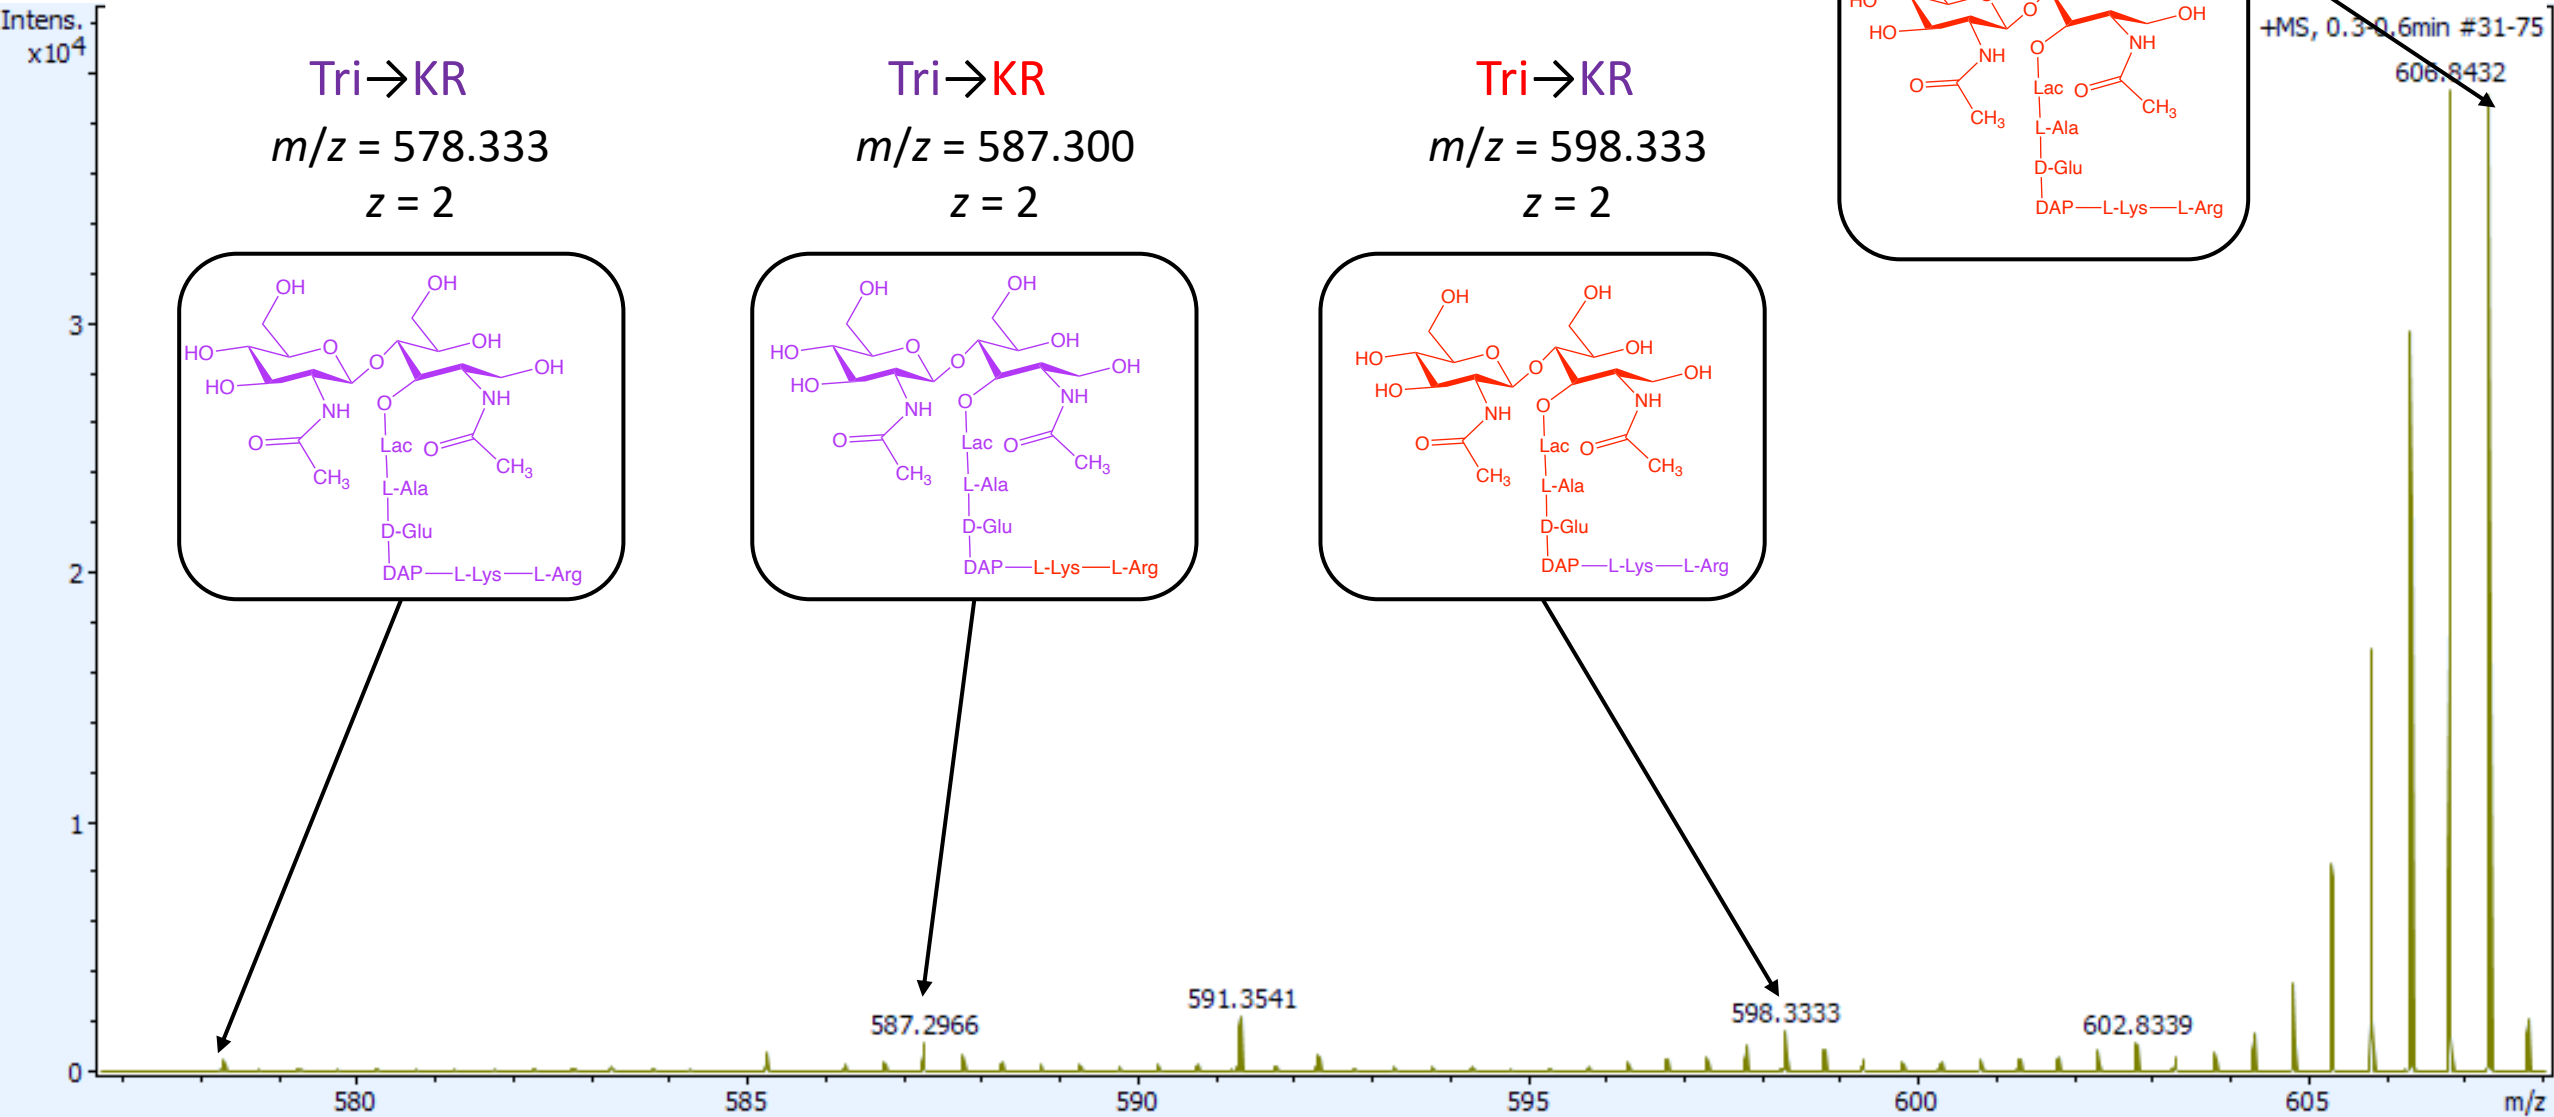

**BW25113**

**t = 20 min**

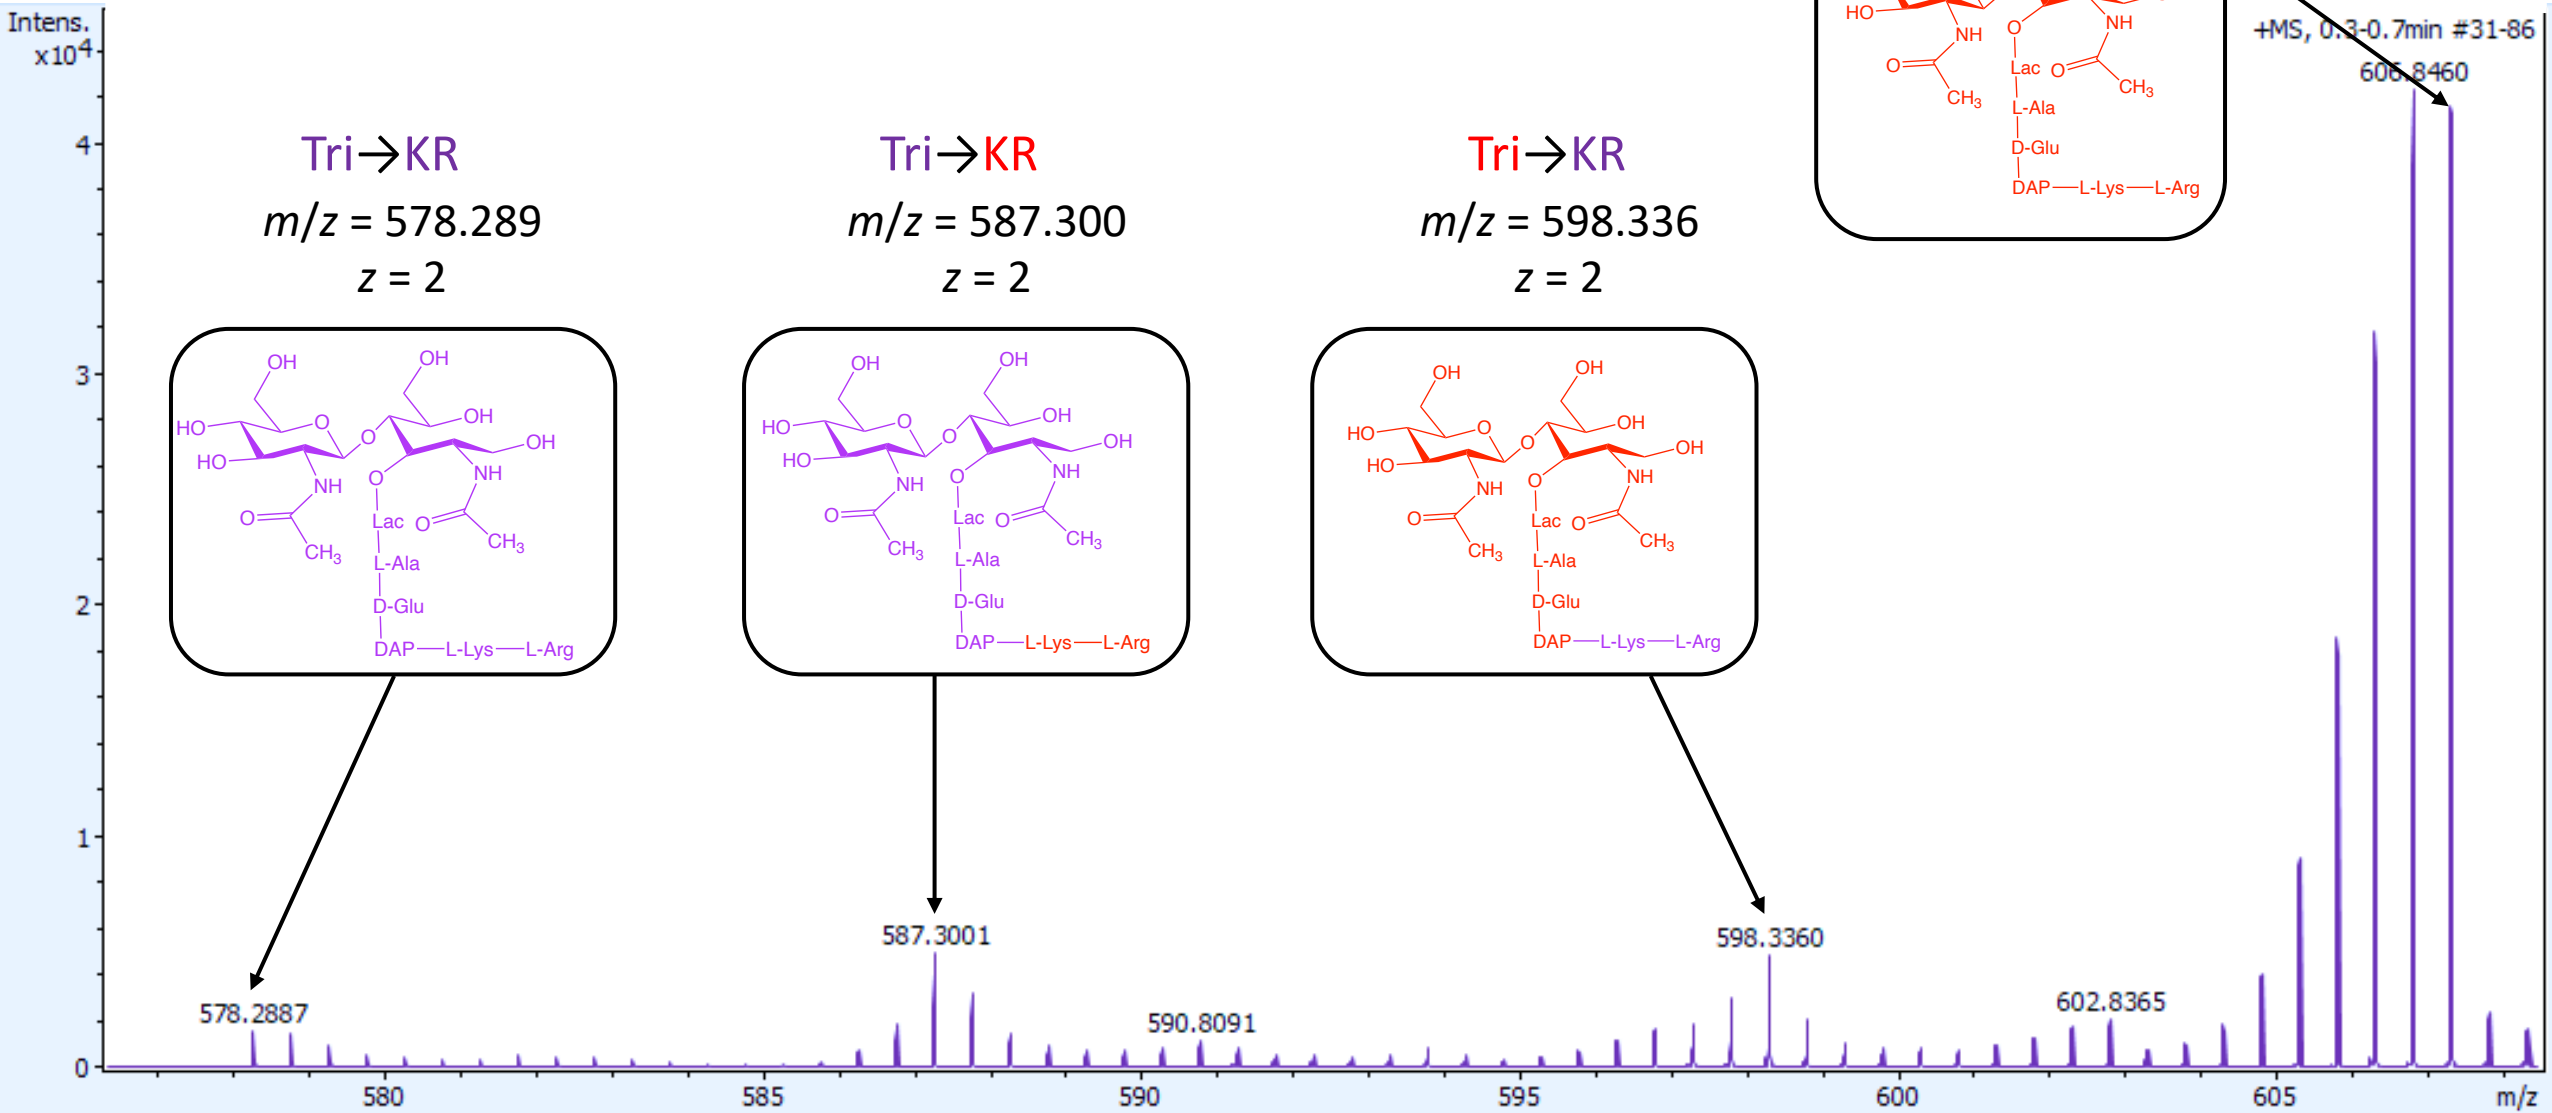

**BW25113**

Tri→KR

**t = 40 min** $m/z = 578.289$   
 $z = 2$ 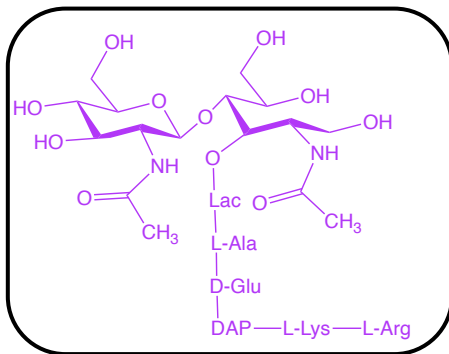

Tri→KR

 $m/z = 587.300$   
 $z = 2$ 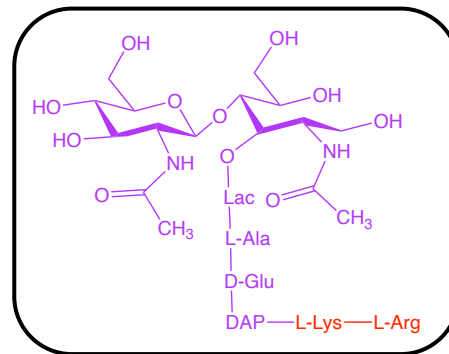

Tri→KR

 $m/z = 598.336$   
 $z = 2$ 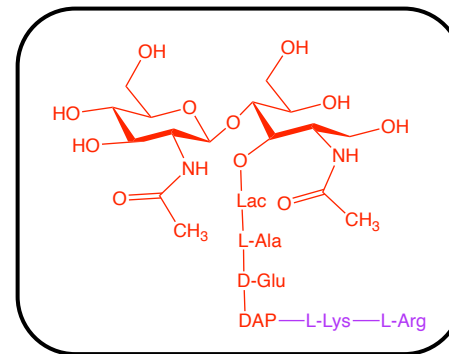

Tri→KR

 $m/z = 607.347$   
 $z = 2$ 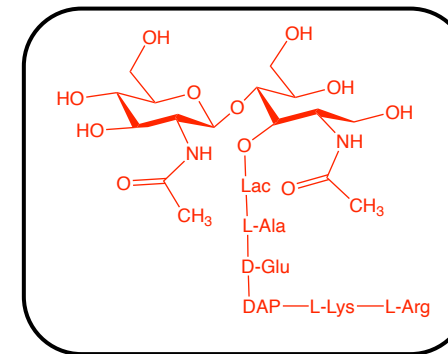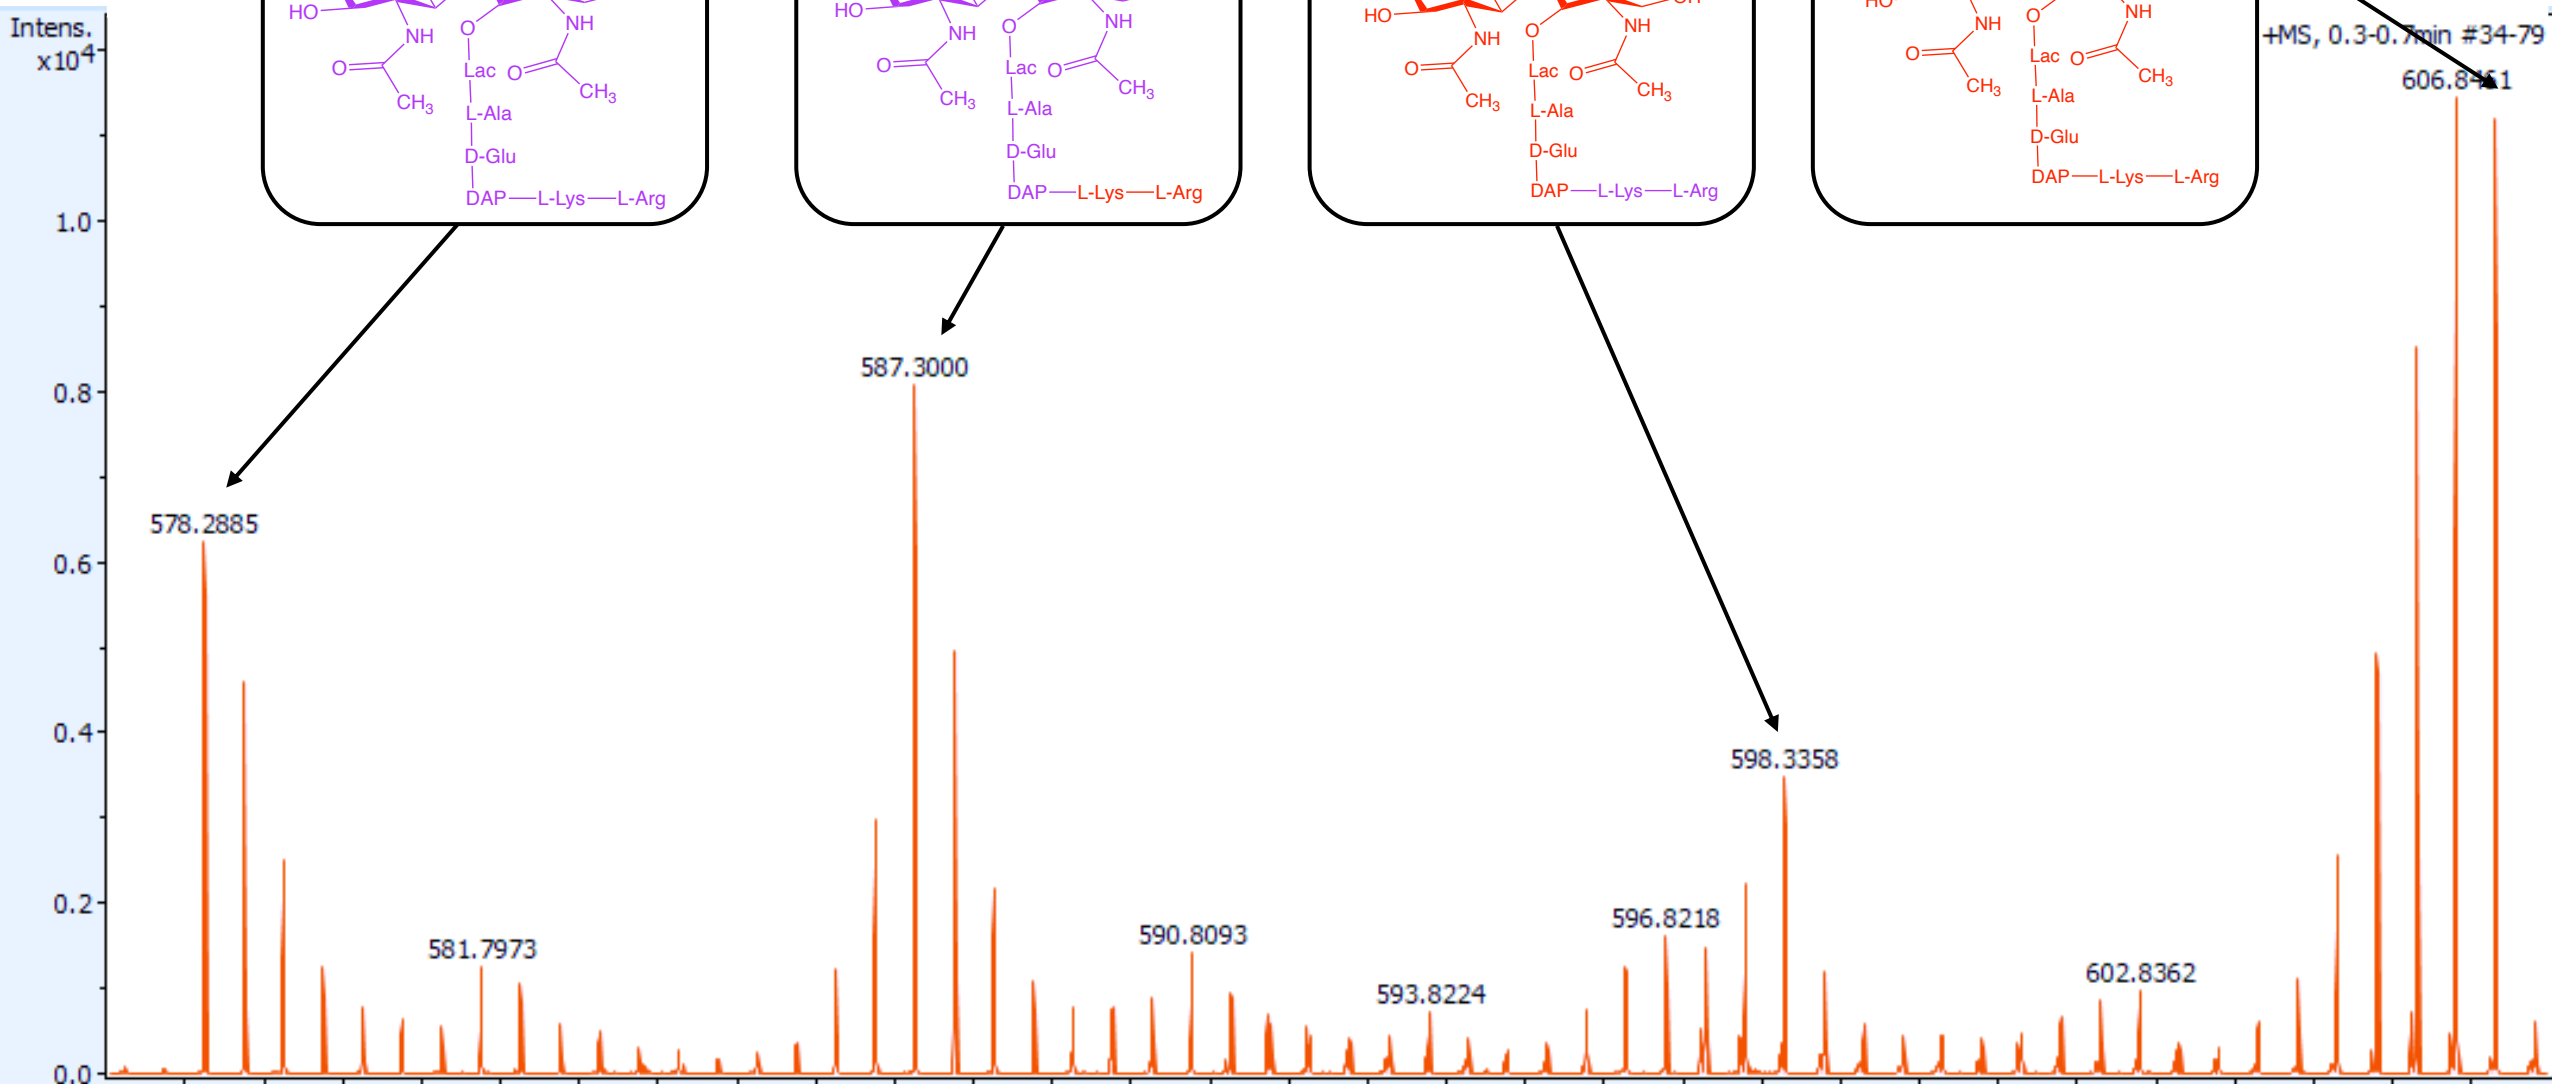

**BW25113**

**t = 60 min**

Tri→KR

$m/z = 578.289$

$z = 2$

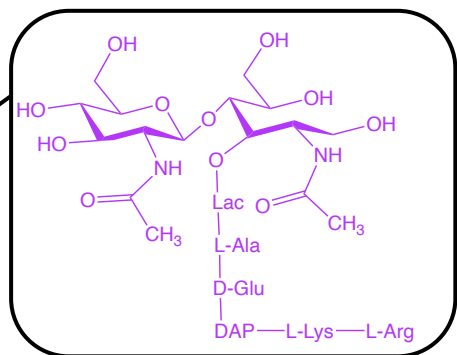

Tri→KR

$m/z = 587.301$

$z = 2$

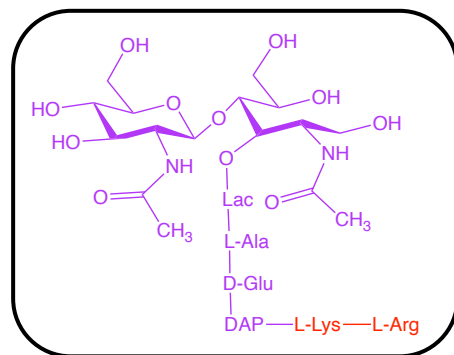

Tri→KR

$m/z = 598.337$

$z = 2$

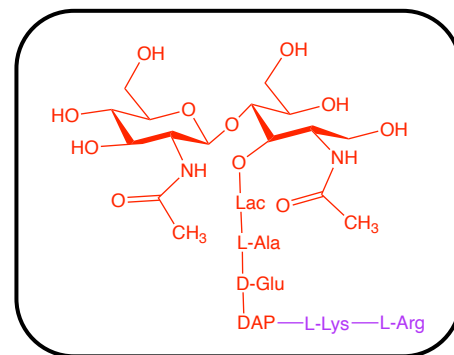

Tri→KR

$m/z = 607.347$

$z = 2$

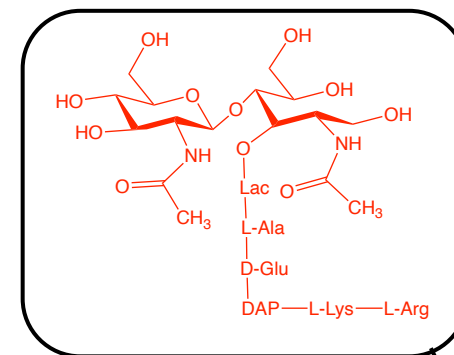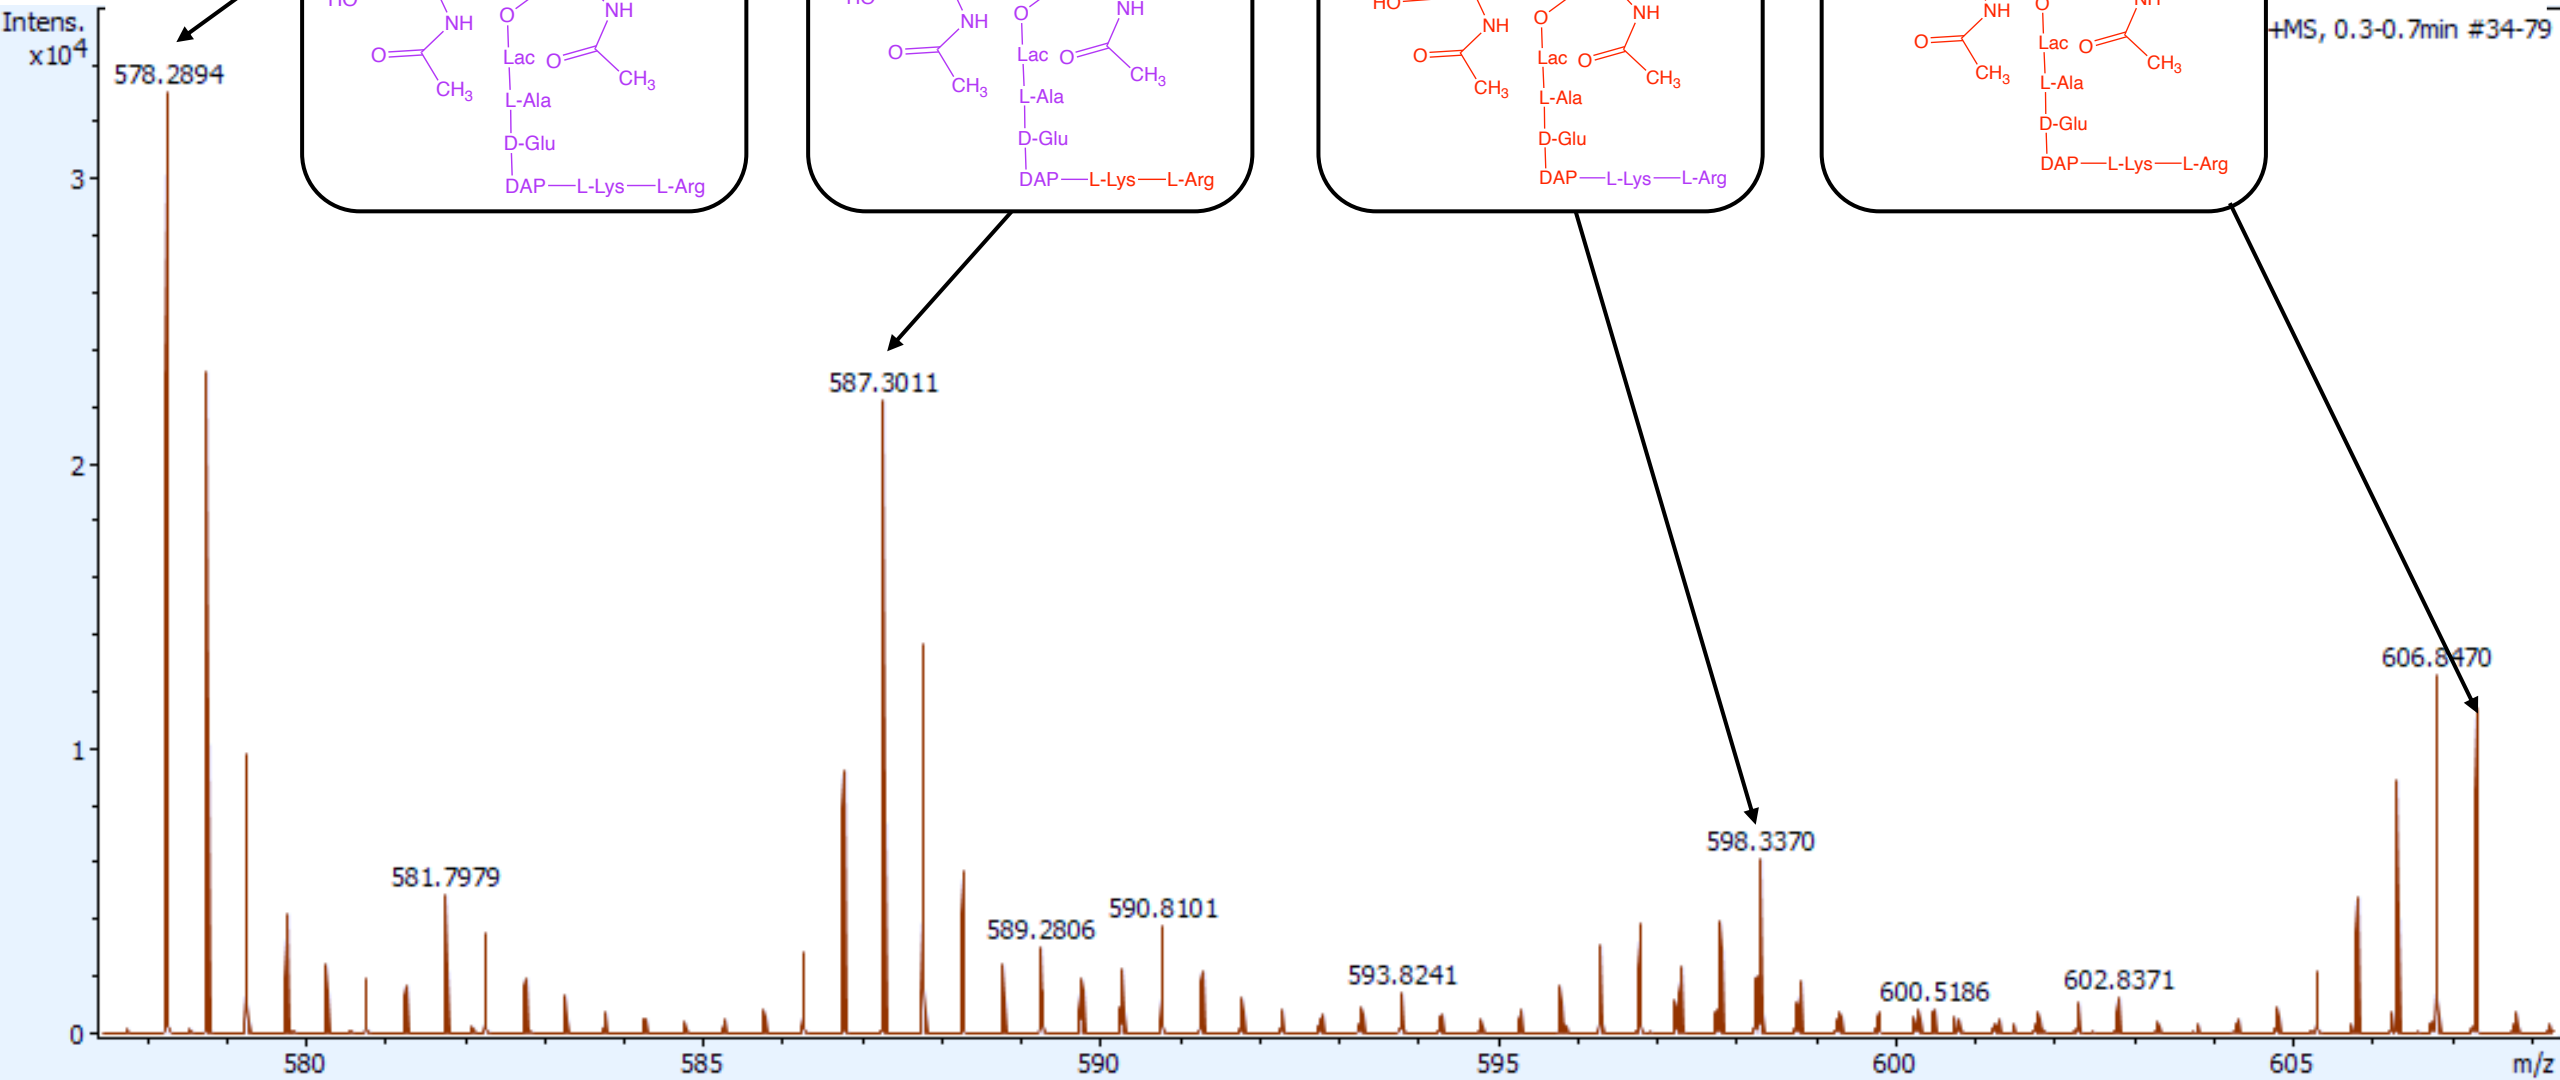

**$\Delta yafK$**

**t = 0 min**

**Tri  $\rightarrow$  KR**  
 $m/z = 607.347$   
 $z = 2$

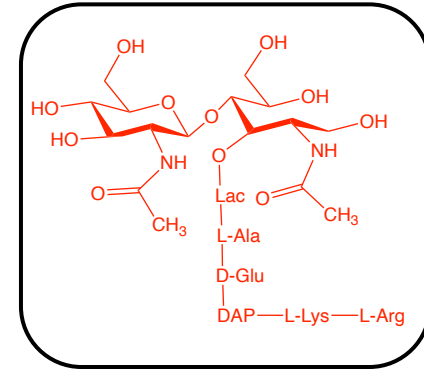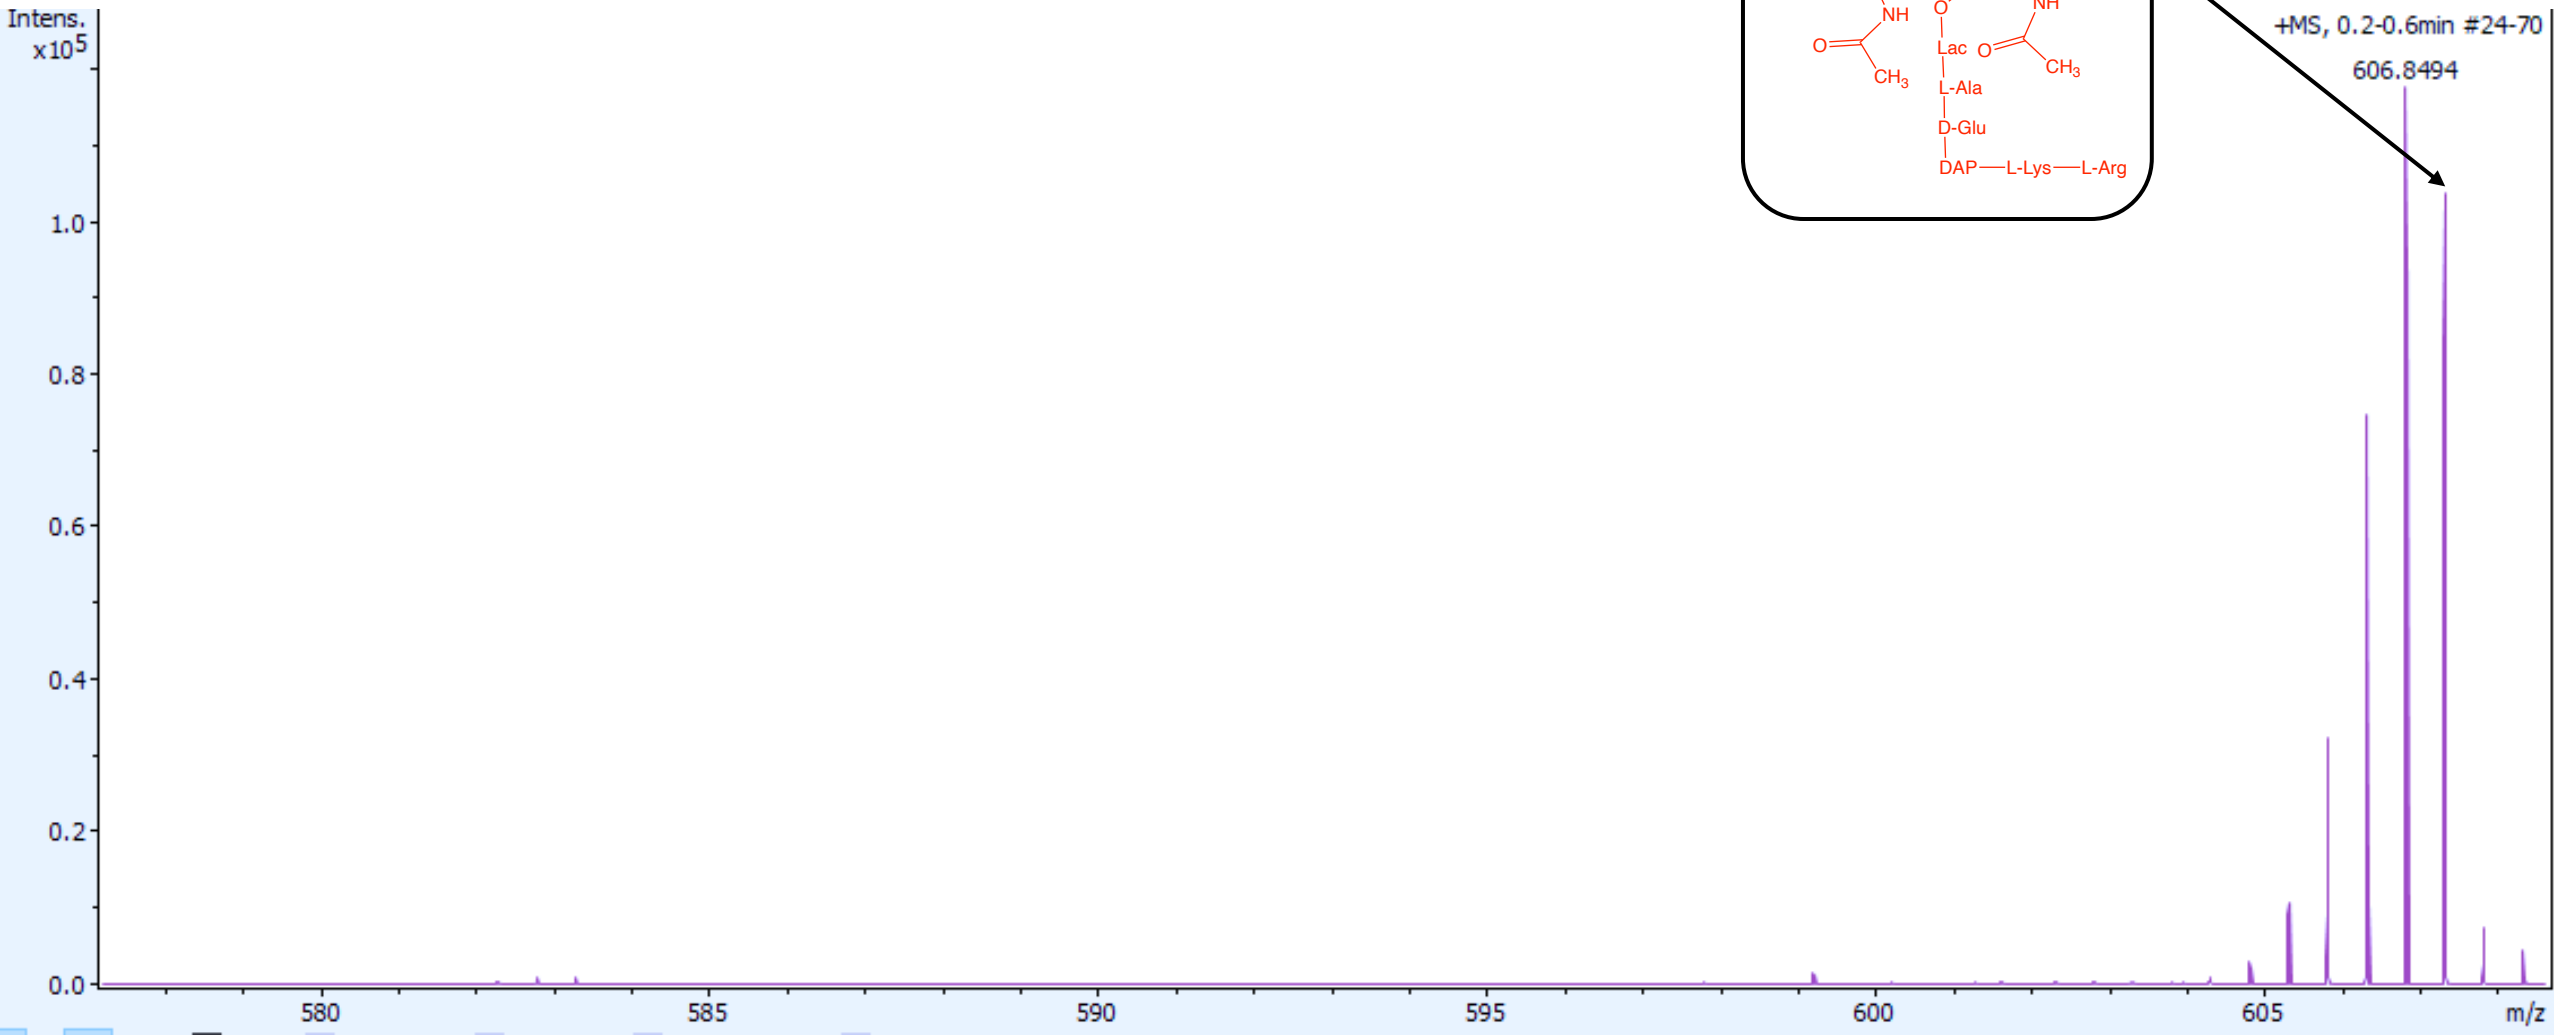

**$\Delta yafK$**

**t = 5 min**

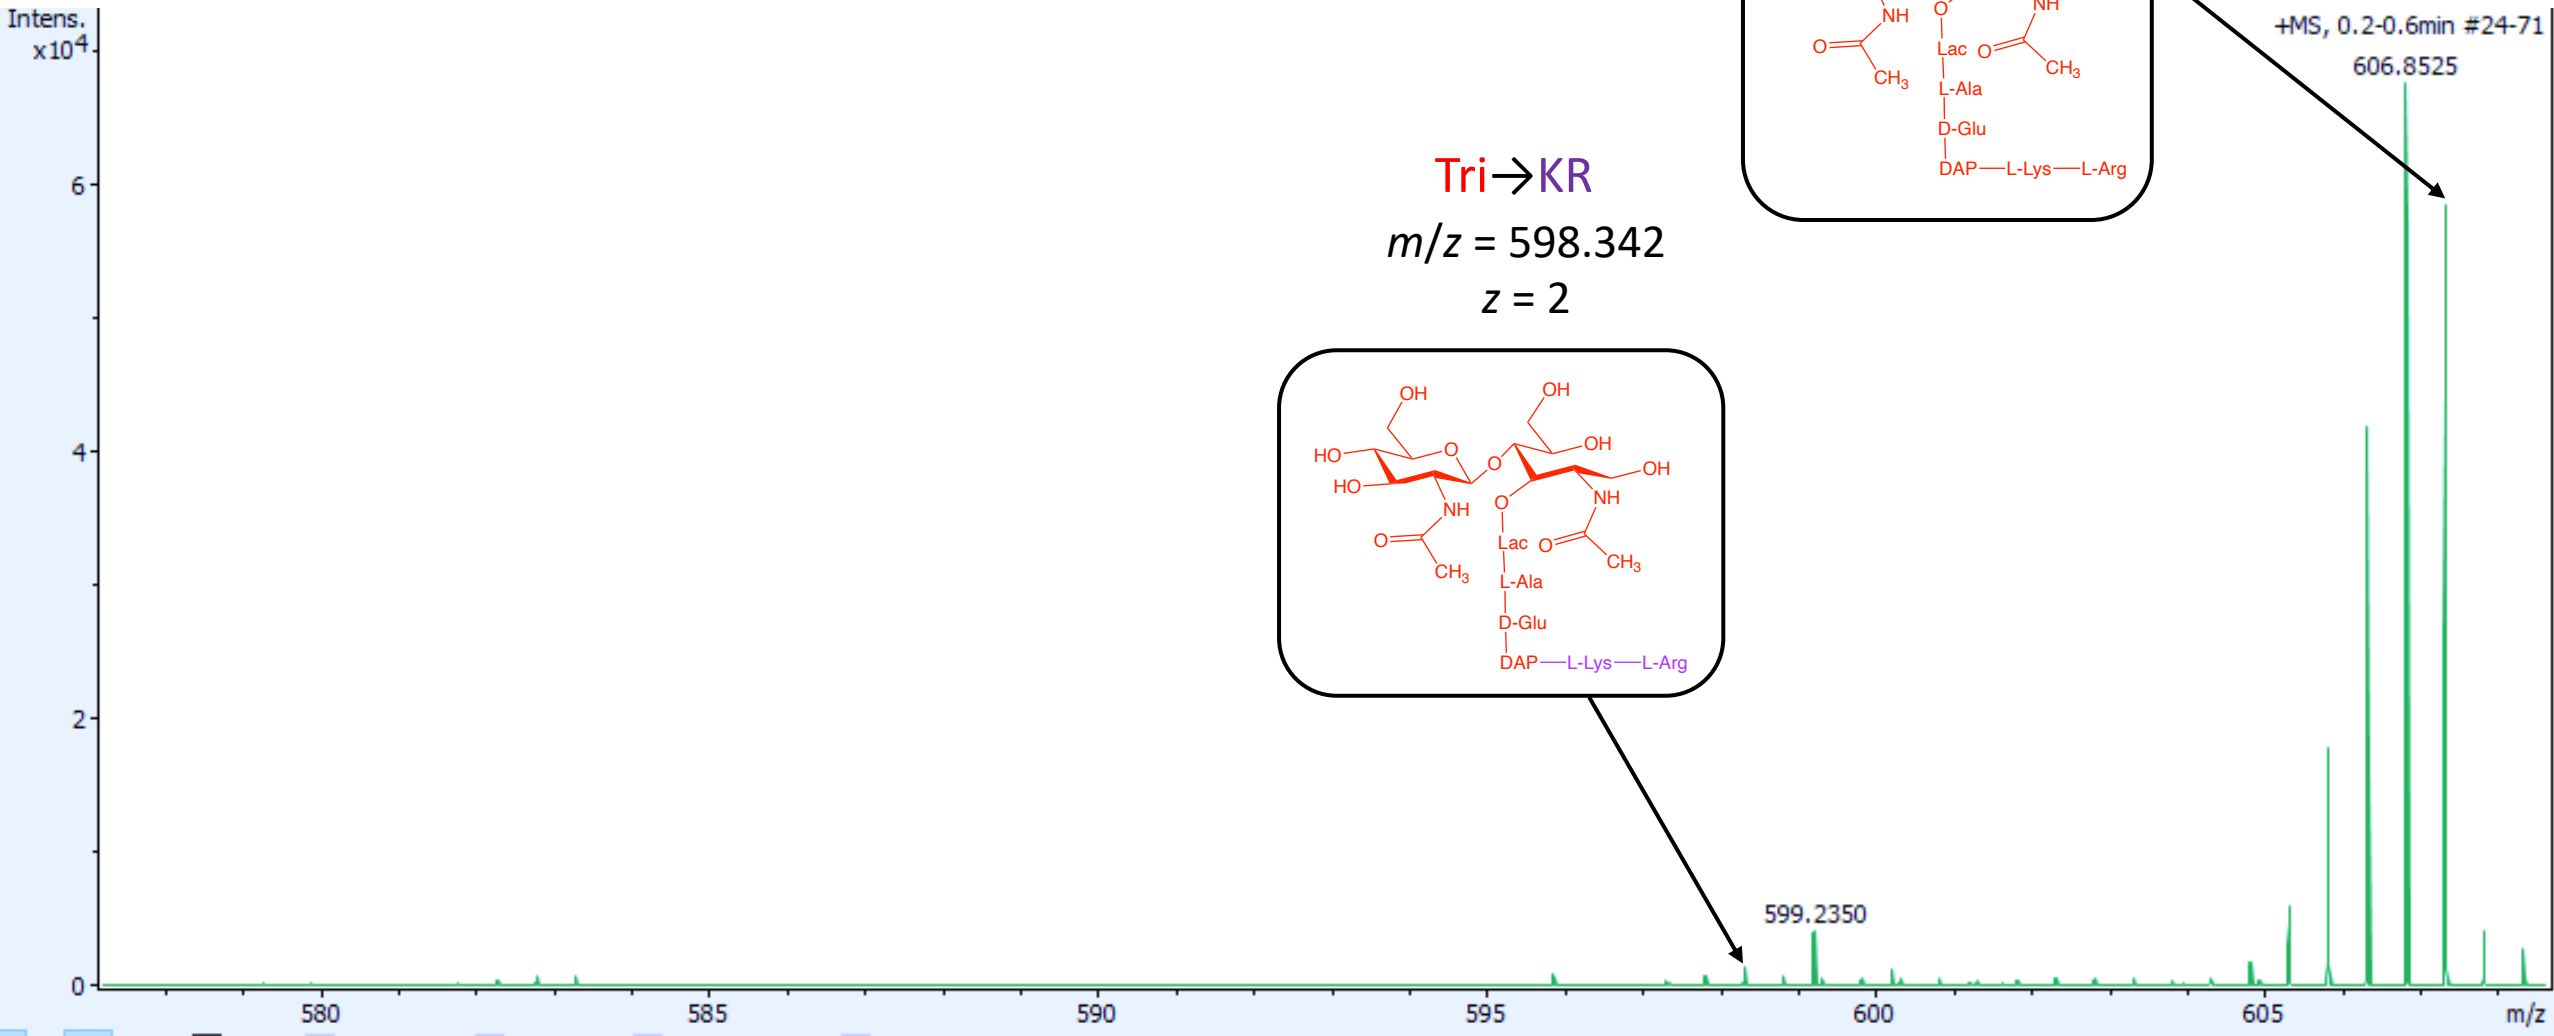



**$\Delta yafK$**

**t = 10 min**

**Tri  $\rightarrow$  KR**

$m/z = 598.336$

$z = 2$

**Tri  $\rightarrow$  KR**

$m/z = 607.346$

$z = 2$

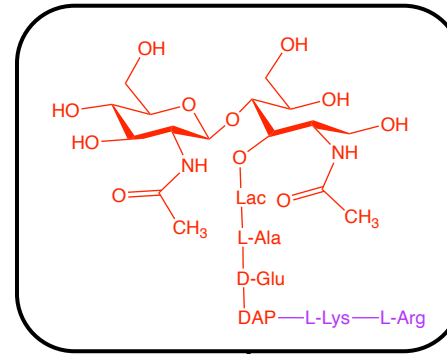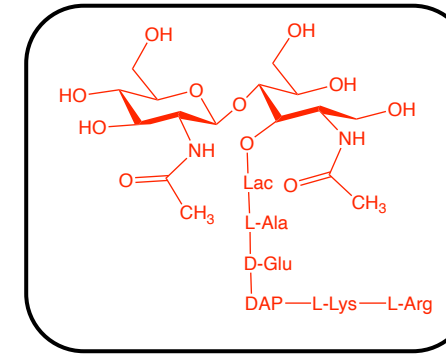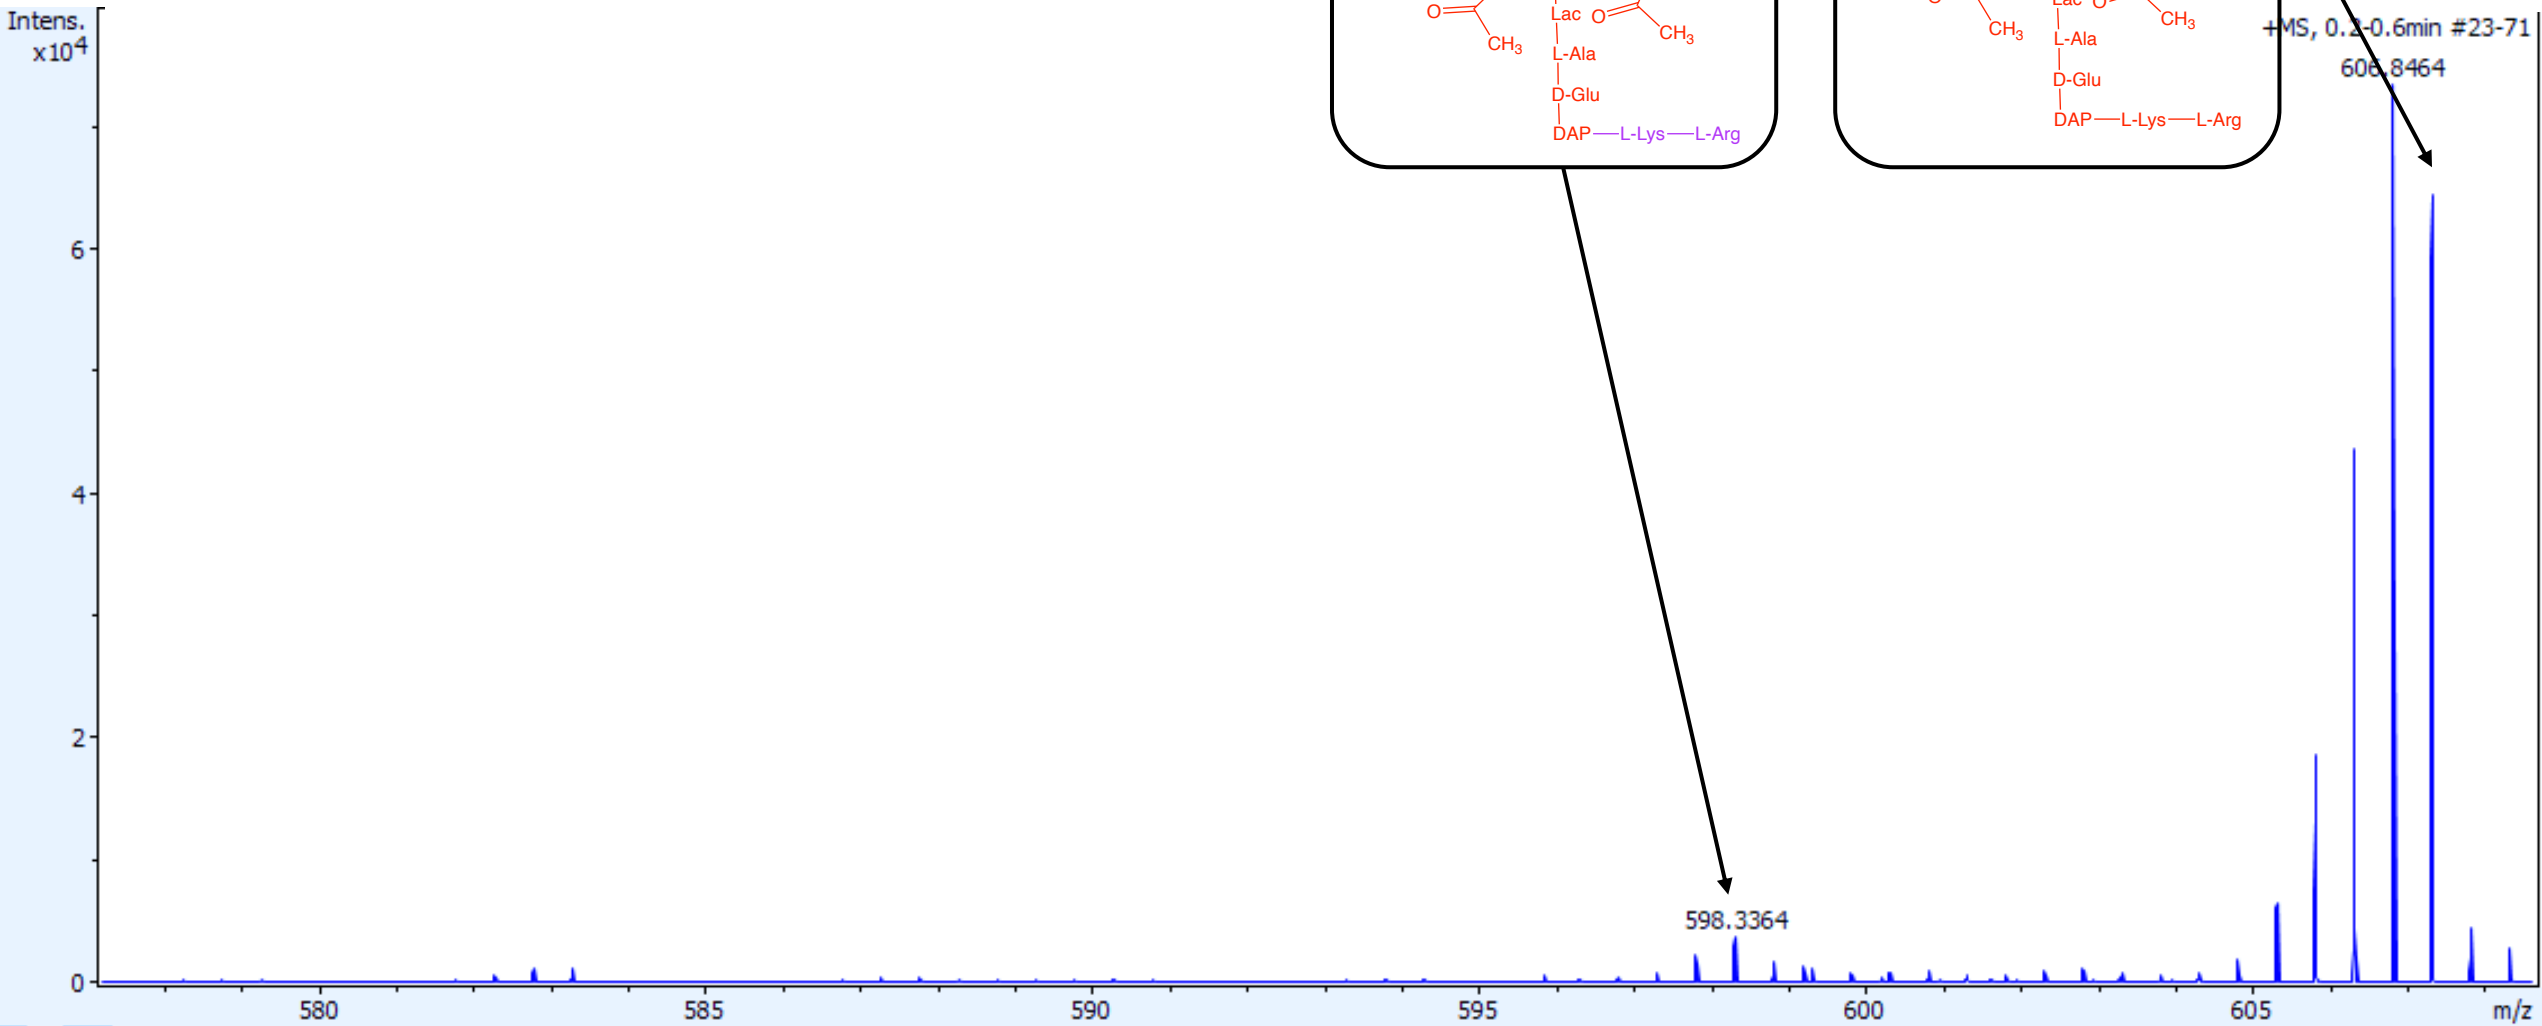

**$\Delta yafK$**   
**t = 20 min**

Tri  $\rightarrow$  KR  
 $m/z = 578.291$   
 $z = 2$

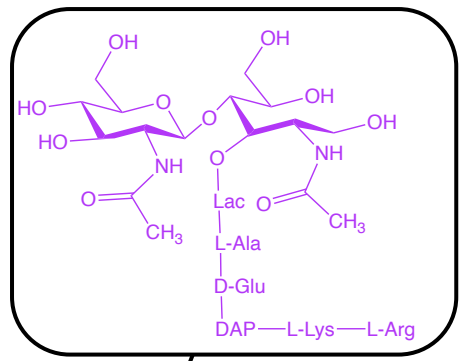

Tri  $\rightarrow$  KR  
 $m/z = 587.304$   
 $z = 2$

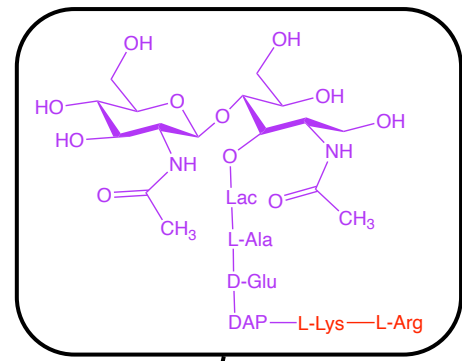

Tri  $\rightarrow$  KR  
 $m/z = 598.339$   
 $z = 2$

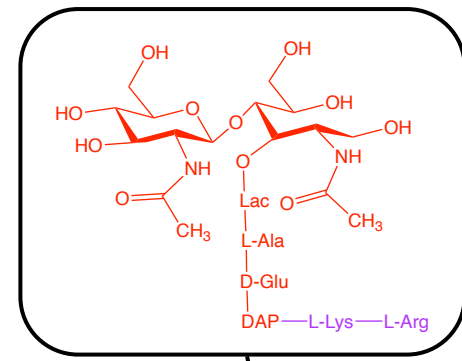

Tri  $\rightarrow$  KR  
 $m/z = 607.346$   
 $z = 2$

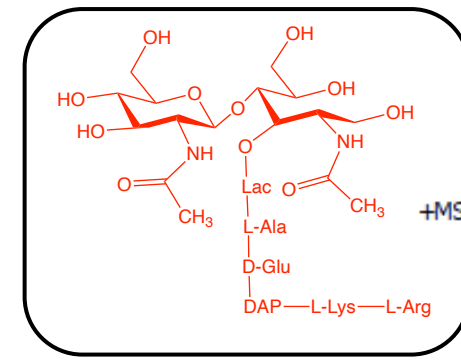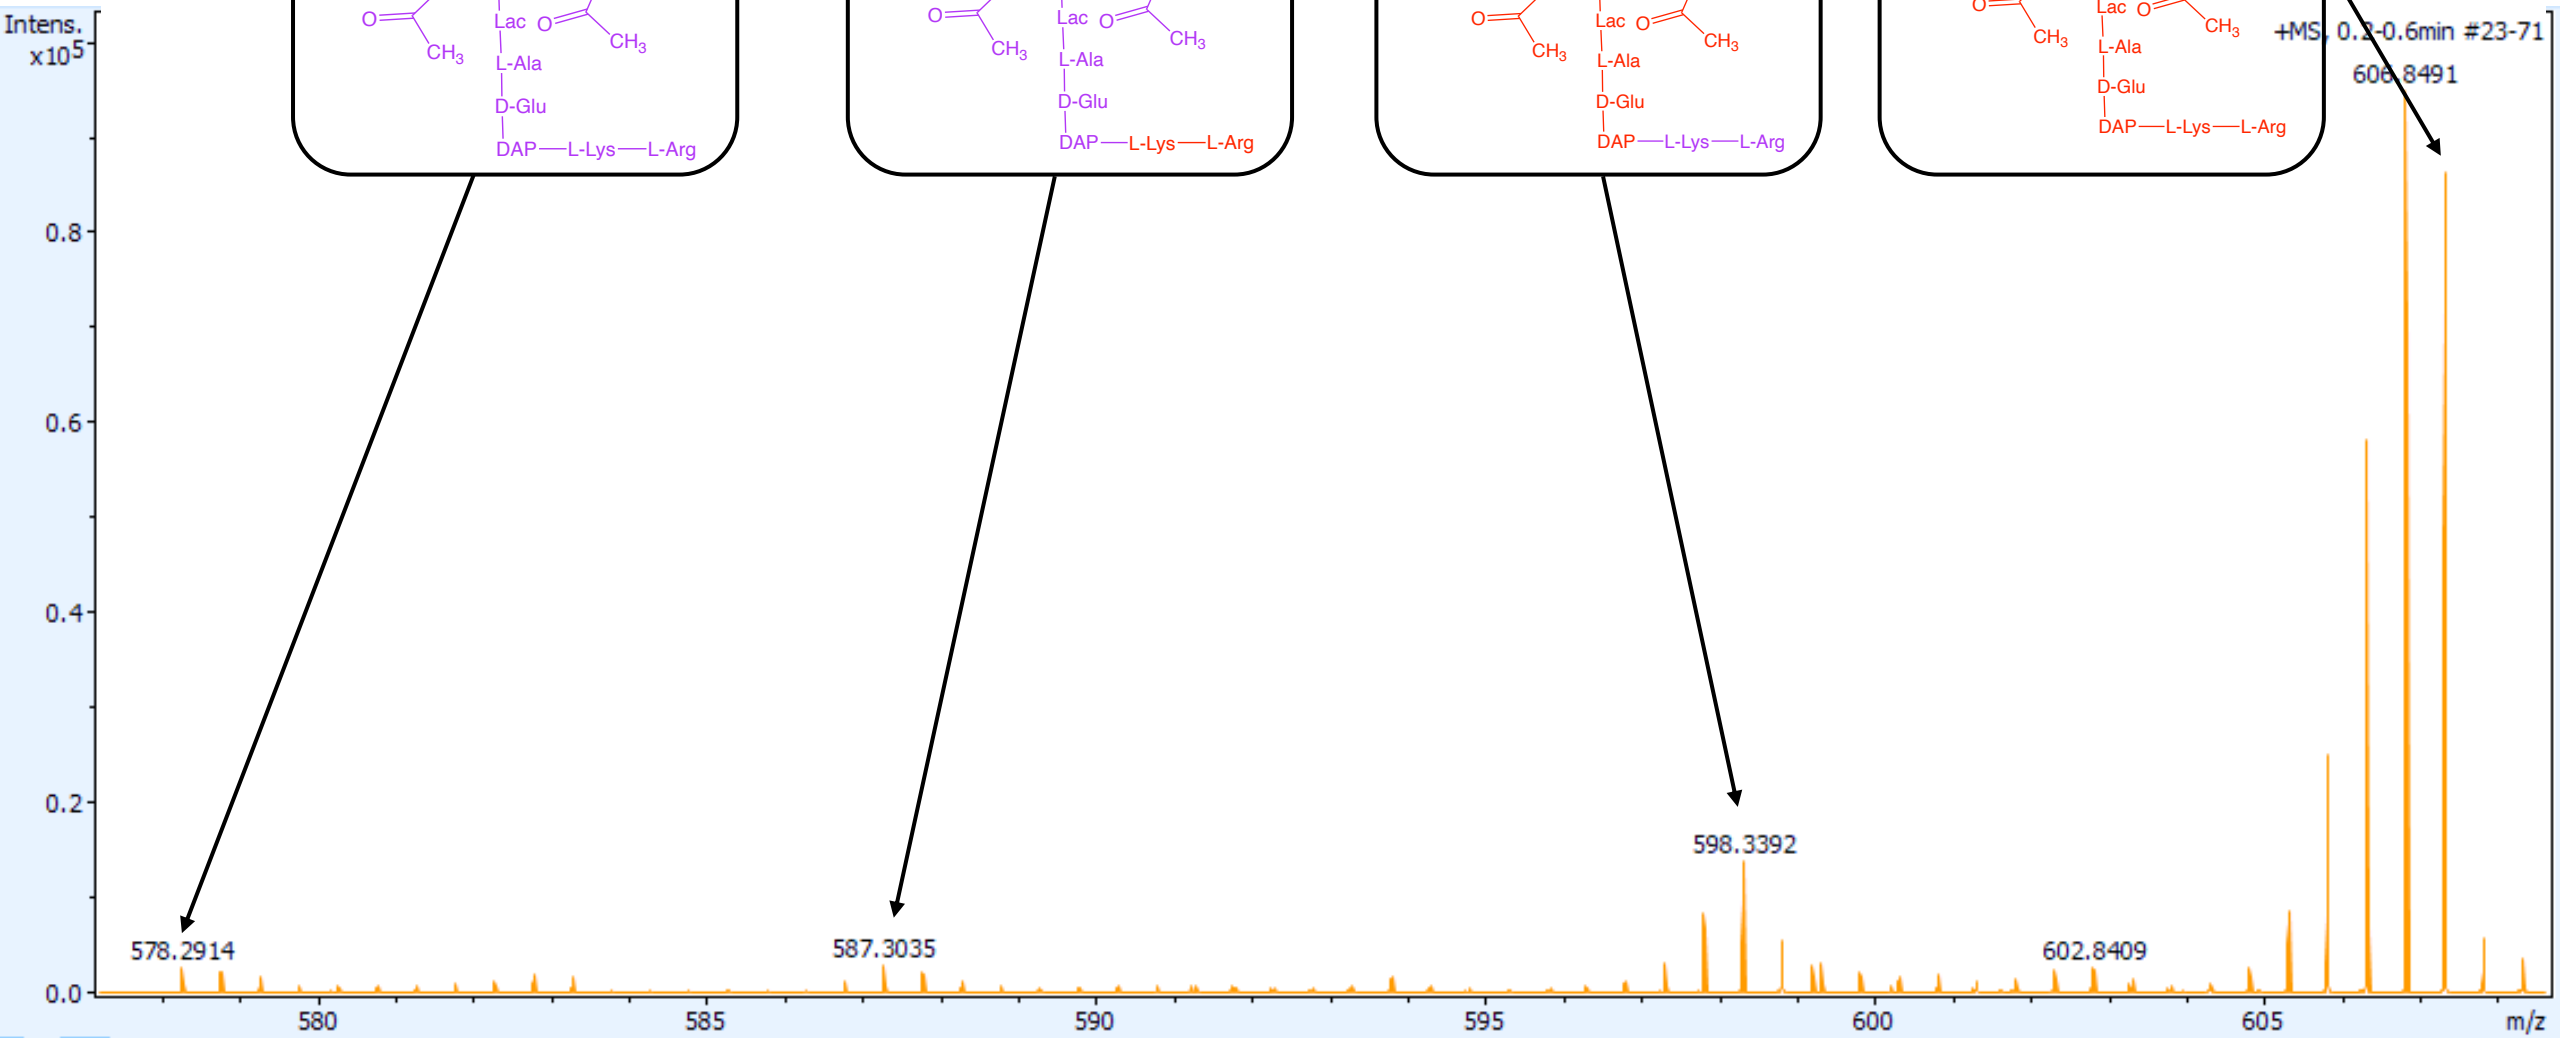

**$\Delta yafK$**   
**t = 40 min**

Tri  $\rightarrow$  KR  
 $m/z = 578.294$   
 $z = 2$

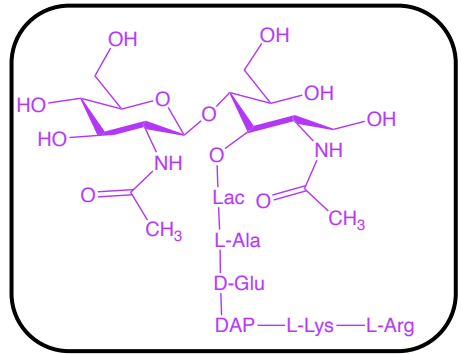

Tri  $\rightarrow$  KR  
 $m/z = 587.307$   
 $z = 2$

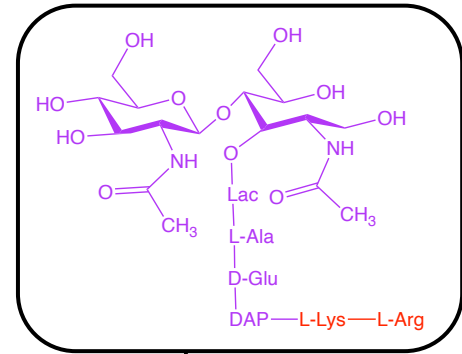

Tri  $\rightarrow$  KR  
 $m/z = 598.342$   
 $z = 2$

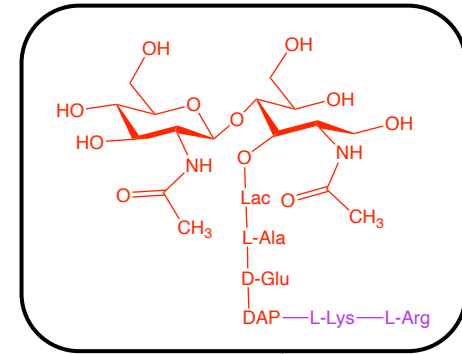

Tri  $\rightarrow$  KR  
 $m/z = 607.346$   
 $z = 2$

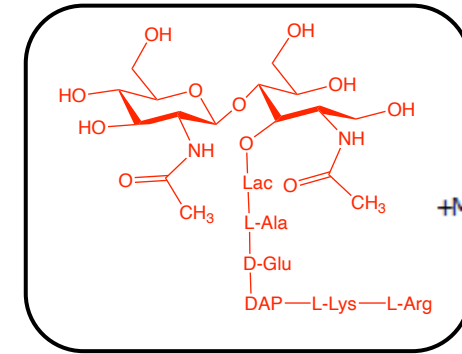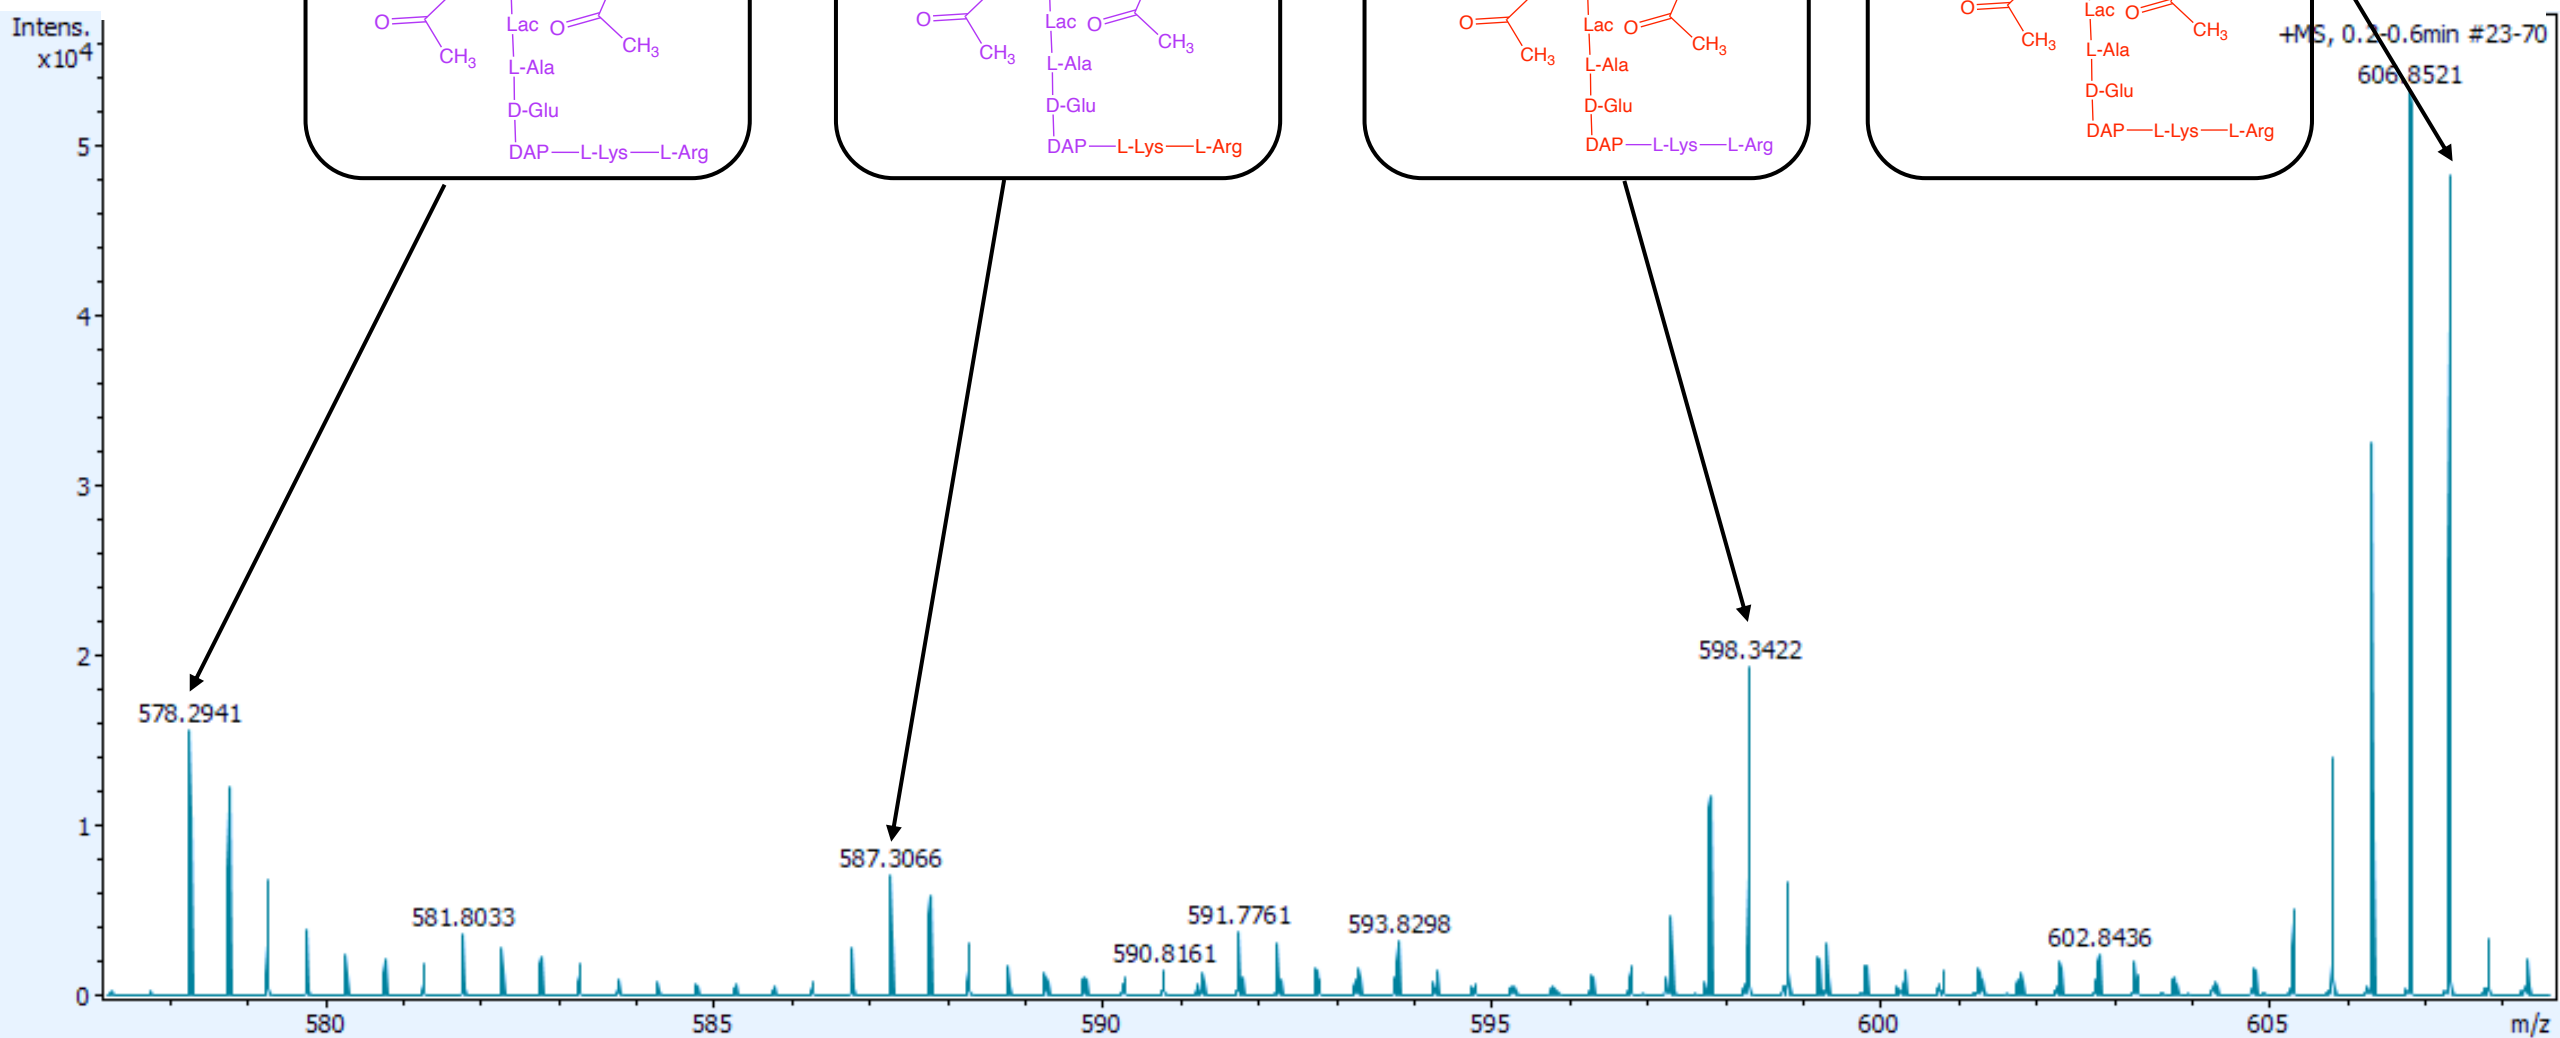

**$\Delta yafK$**   
**t = 60 min**

Tri→KR  
 $m/z = 578.288$   
 $z = 2$

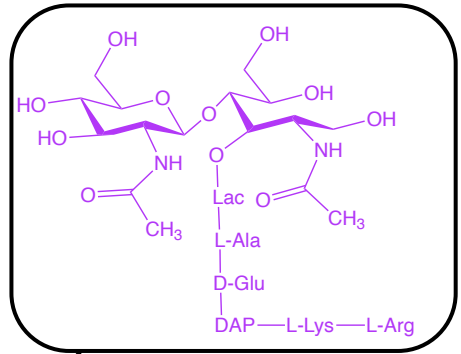

Tri→KR  
 $m/z = 587.301$   
 $z = 2$

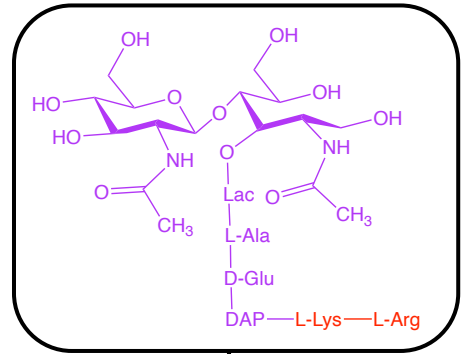

Tri→KR  
 $m/z = 598.336$   
 $z = 2$

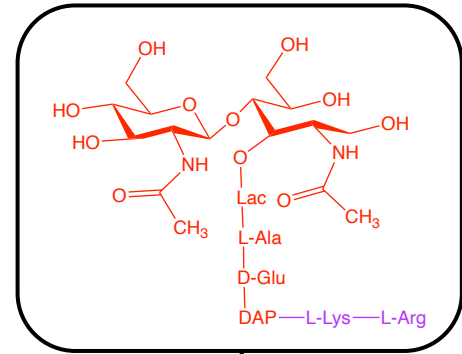

Tri→KR  
 $m/z = 607.346$   
 $z = 2$

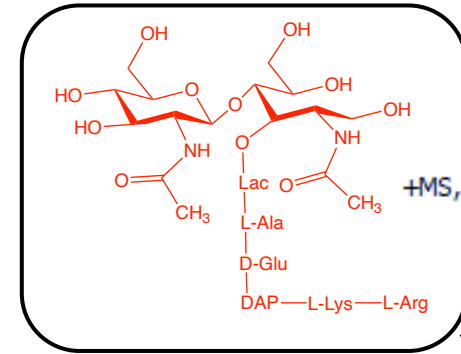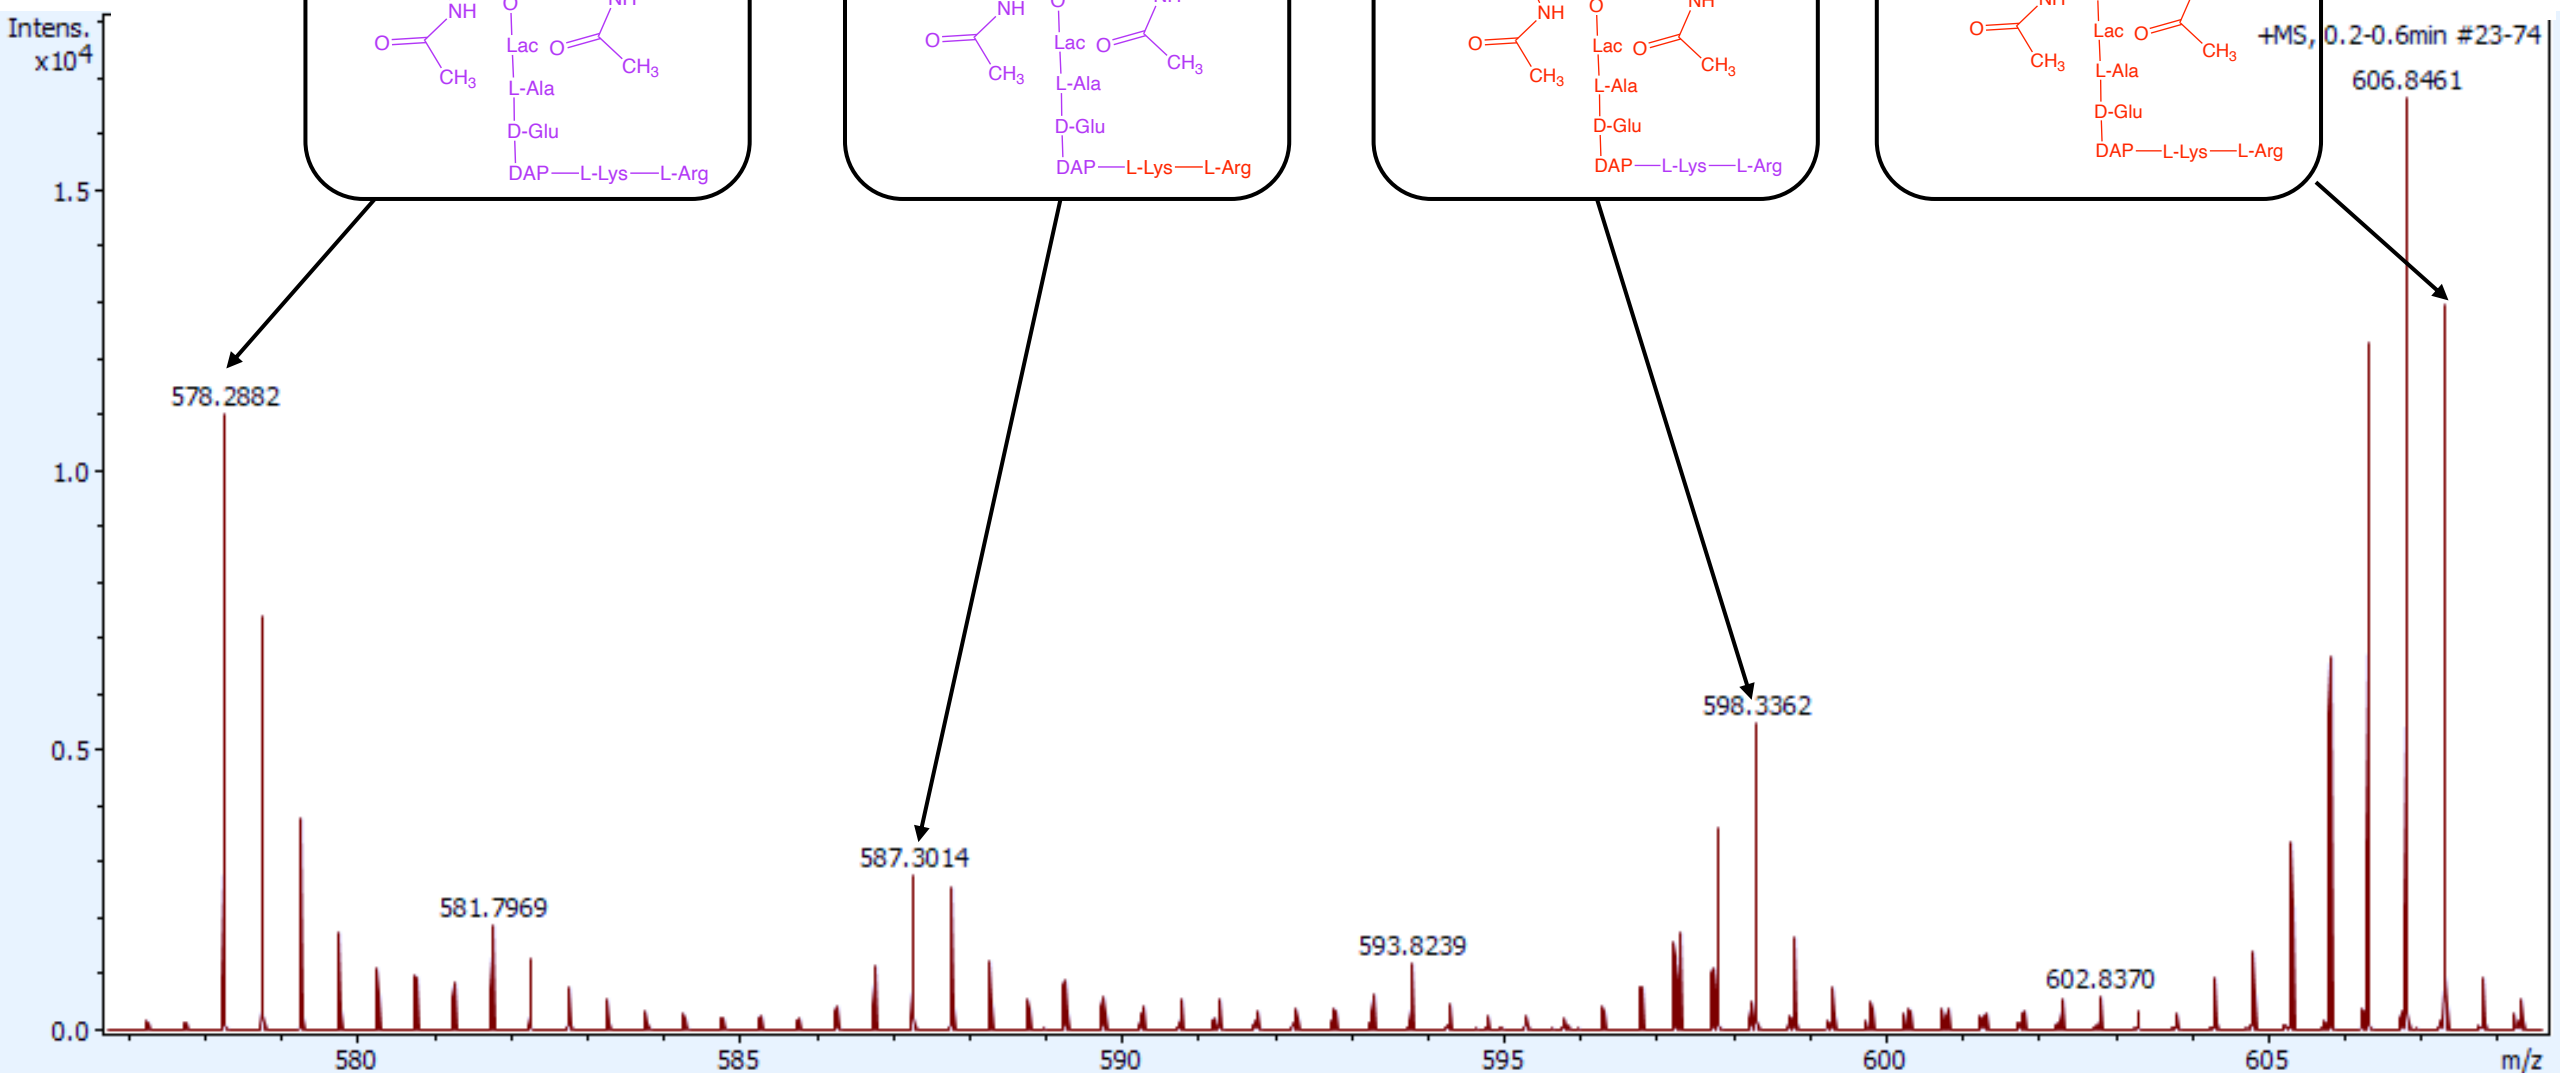

Supplement: supp1 [file elife-91598-supp1-v1.pdf]
